# Supplementary material for: TMEM87a/Elkin1, a component of a novel mechanoelectrical transduction pathway, modulates melanoma adhesion and migration
Source: eLife journal article supplement (doi:10.7554/elife.53308), 2020-03-31
Supplement: supp [file elife-53308-supp-v1.zip]

Archive with 26 entries (26 files):
- elife_poa_e53308_Figure_2_video_2.avi
- elife_poa_e53308_Figure_5_figure_supplement_1.pdf
- elife_poa_e53308_Figure_4_source_data_1.docx
- elife_poa_e53308_Figure_4_figure_supplement_1.pdf
- elife_poa_e53308_Figure_2_video_1.mp4
- elife_poa_e53308_Figure_3_figure_supplement_1.pdf
- elife_poa_e53308_Figure_2_figure_supplement_1.pdf
- elife_poa_e53308_Supplementary_file_2.docx
- elife_poa_e53308_Figure_1_figure_supplement_1.pdf
- elife_poa_e53308_Figure_6_figure_supplement_1.pdf
- elife_poa_e53308_Figure_7_source_data_1.docx
- elife_poa_e53308_Figure_8_source_data_1.docx
- elife_poa_e53308_Figure_7_figure_supplement_2.pdf
- elife_poa_e53308_Figure_7_video_2.mp4
- elife_poa_e53308_Figure_4_figure_supplement_2.pdf
- elife_poa_e53308_Figure_7_figure_supplement_1.pdf
- elife_poa_e53308_Figure_1_figure_supplement_2.pdf
- elife_poa_e53308_Supplementary_file_1.xlsx
- elife_poa_e53308_Figure_1_source_data_1.docx
- elife_poa_e53308_Figure_3_source_data_1.docx
- elife_poa_e53308_Transparent_Reporting_File.pdf
- elife_poa_e53308_Figure_6_source_data_1.docx
- elife_poa_e53308_Figure_8_figure_supplement_1.pdf
- elife_poa_e53308_Figure_3_figure_supplement_2.pdf
- elife_poa_e53308_Figure_7_video_1.mp4
- elife_poa_e53308_Figure_2_figure_supplement_2.pdf
