# Supplementary material for: TMEM87a/Elkin1, a component of a novel mechanoelectrical transduction pathway, modulates melanoma adhesion and migration
Source: eLife journal article supplement (doi:10.7554/elife.53308), 2020-03-31
Supplement: supp [file elife-53308-supp-v1.zip › elife_poa_e53308_Figure_1_figure_supplement_1.pdf]

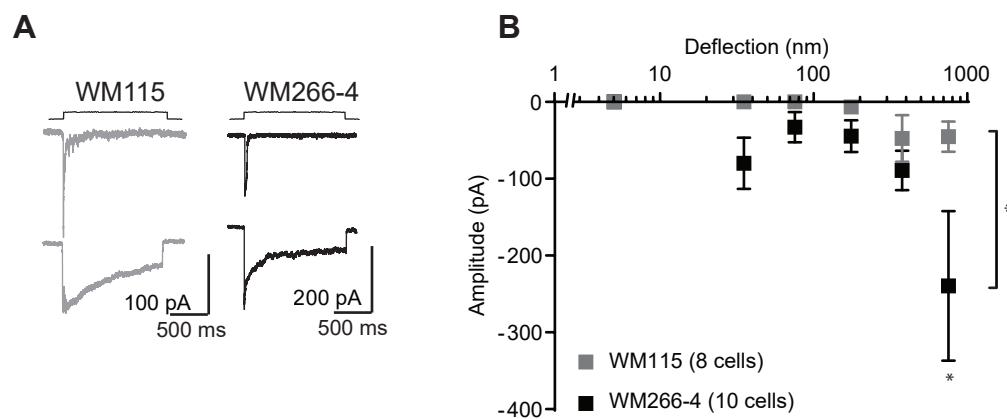

**Figure 1- figure supplement 1: MA currents in melanoma cell lines**

(A) Example traces of MA currents activated by pillar deflections in WM115 cells and in WM266-4 cells. (B) Stimulus-response curves of MA current activation in WM115 cells vs WM266-4 cells. WM266-4 cells were more sensitive to pillar deflections, in comparison with WM115 cells, on uncoated arrays (ordinary two-way ANOVA,  $n = 10$  and  $8$  cells respectively, \*  $P = 0.04$ ; Sidak's multiple comparison, \*  $P = 0.01$ ).
