# Supplementary material for: TMEM87a/Elkin1, a component of a novel mechanoelectrical transduction pathway, modulates melanoma adhesion and migration
Source: eLife journal article supplement (doi:10.7554/elife.53308), 2020-03-31
Supplement: supp [file elife-53308-supp-v1.zip › elife_poa_e53308_Figure_1_figure_supplement_2.pdf]

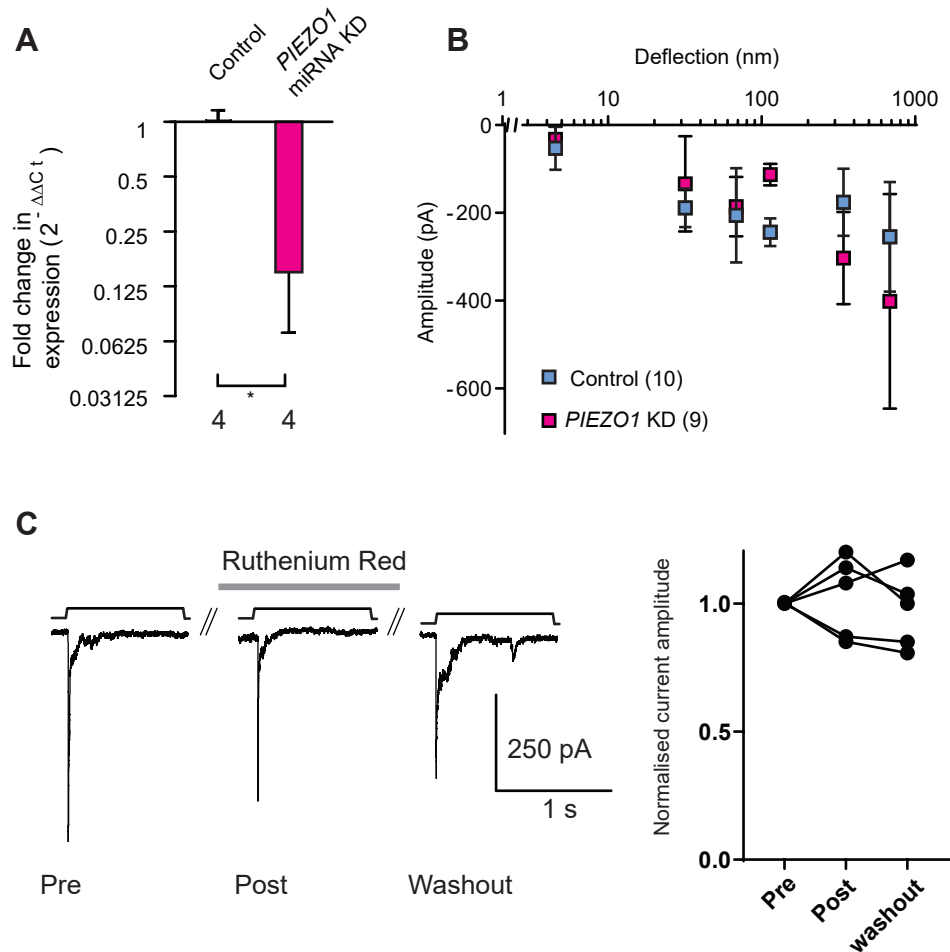

**Figure 1- figure supplement 2: Knockdown of *PIEZO1* and *Elkin1* in WM266-4 cells**  
**(A)** A qPCR analysis shows that levels of *PIEZO1* transcript were significantly reduced in WM266-4 cells when these cells were transfected with a plasmid encoding miRNA targeting *PIEZO1* transcript (Mann-Whitney, control n = 4, KD n = 4, \*  $P = 0.0286$ ). **(B)** Despite the decrease in *PIEZO1* transcript, the stimulus-response curve in *PIEZO1* KD cells did not differ from the controls. **(C)** Deflection-evoked currents are not inhibited by Ruthenium Red (RR). Mechanical currents were evoked in WM266-4 cells then RR (30  $\mu$ M) was flowed onto cells for 3 min and a second stimulus applied, a final stimulus was applied after RR had been washed out for 2 min. Quantification of current amplitude reveals no block of mechanically-evoked currents by RR.
