# Supplementary material for: TMEM87a/Elkin1, a component of a novel mechanoelectrical transduction pathway, modulates melanoma adhesion and migration
Source: eLife journal article supplement (doi:10.7554/elife.53308), 2020-03-31
Supplement: supp [file elife-53308-supp-v1.zip › elife_poa_e53308_Figure_2_figure_supplement_1.pdf]

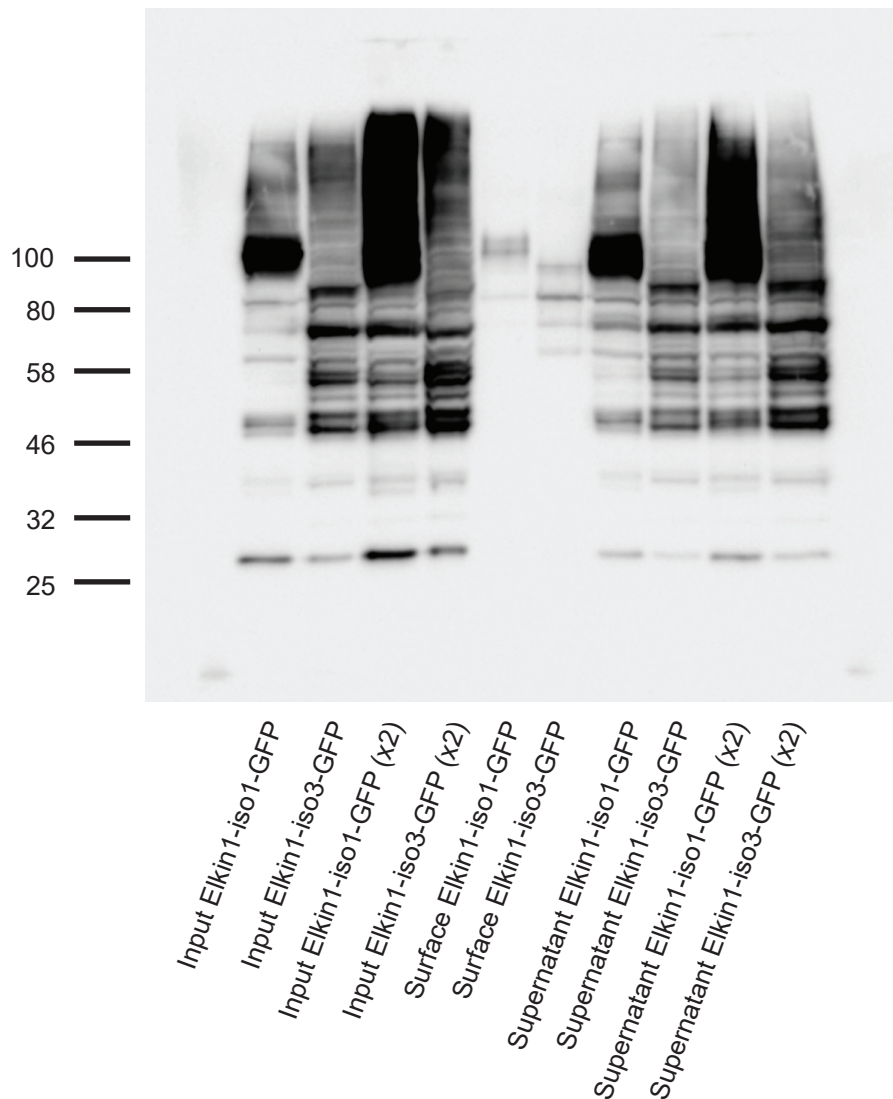

**Figure 2- figure supplement 2: Cell-surface biotinylation of Elkin1-GFP fusion proteins.**

Elkin1-iso1-GFP or Elkin1-iso3-GFP were overexpressed in HEK-293T P1KO cells. Cells were biotinylated and the cell-surface fraction isolated by pulldown of biotinylated proteins using Neutra-vidin beads. Input samples, the surface fraction and the supernatant were separated using SDS-PAGE, transferred to a PVDF membrane and Elkin-1-GFP fusion proteins were detected using an anti-GFP antibody. Both Elkin1-iso1 and Elkin1-iso3 were present in the plasma membrane fraction, as well as the supernatant.
