# Supplementary material for: TMEM87a/Elkin1, a component of a novel mechanoelectrical transduction pathway, modulates melanoma adhesion and migration
Source: eLife journal article supplement (doi:10.7554/elife.53308), 2020-03-31
Supplement: supp [file elife-53308-supp-v1.zip › elife_poa_e53308_Figure_2_figure_supplement_2.pdf]

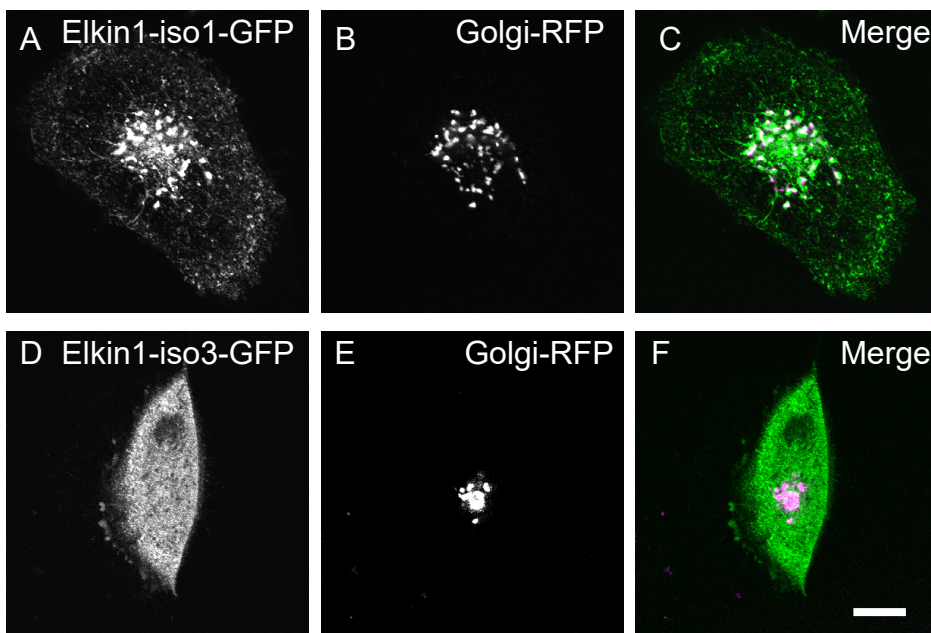

**Figure 2- figure supplement 2: Visualisation of Elkin1-iso1 and -iso3 with laser-scanning confocal microscopy.**

WM266-4 cells were transfected with plasmids encoding Elkin1-iso1-GFP (**A**) or Elkin1-iso3-GFP (**D**). Cells were additionally transduced with a vector encoding a Golgi-RFP marker (**B,E**). Overlays are presented in (**C,F**). It is clear that Elkin1-iso1 localises partially, but not exclusively, to the Golgi. Scale bar, 10  $\mu\text{m}$ .
