# Supplementary material for: TMEM87a/Elkin1, a component of a novel mechanoelectrical transduction pathway, modulates melanoma adhesion and migration
Source: eLife journal article supplement (doi:10.7554/elife.53308), 2020-03-31
Supplement: supp [file elife-53308-supp-v1.zip › elife_poa_e53308_Figure_3_figure_supplement_1.pdf]

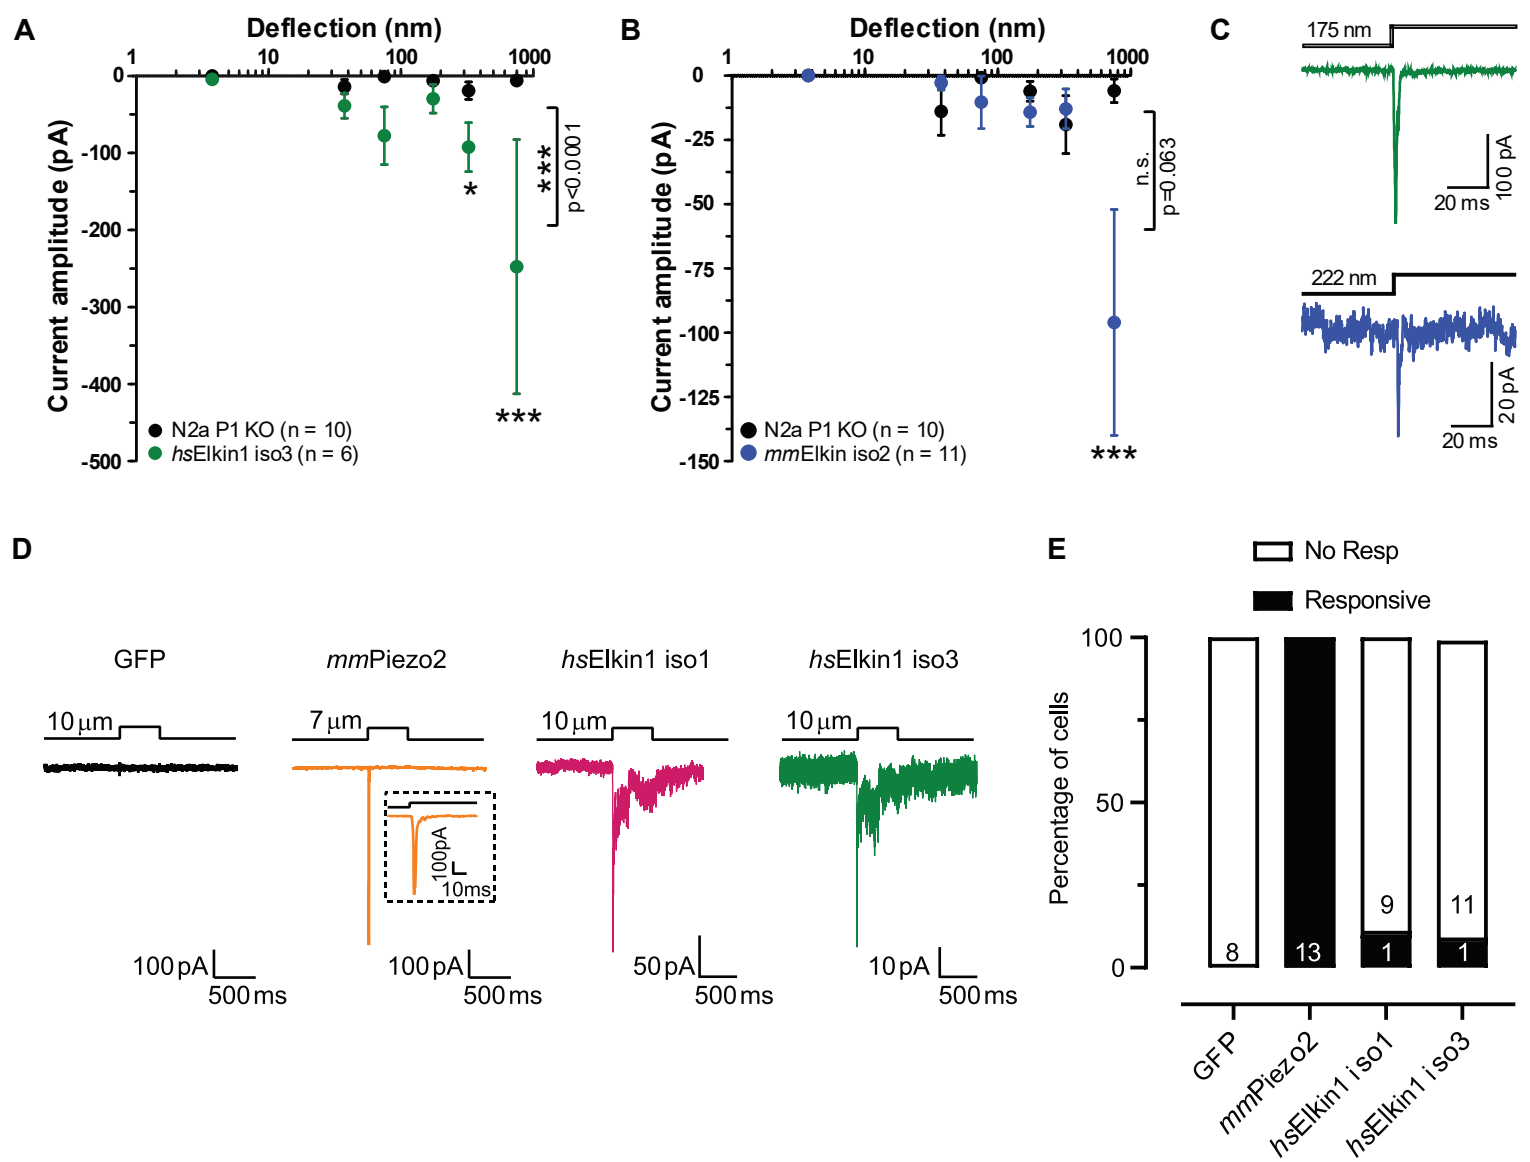

**Figure 3- figure supplement 1: Electrophysiological characterisation of *hsElkin1*-iso1, *hsElkin1*-iso3 and *mmElkin1*.**

Mechanically-evoked currents can be measured when *hsElkin1*-iso3 (**A**) or *mmElkin1* (**B**) are expressed in *N2a<sup>Piezo1-/-</sup>* cells. Overall differences between *hsElkin1*-iso3 and *N2a<sup>Piezo1-/-</sup>* cells as well as between *mmElkin1* and *N2a<sup>Piezo1-/-</sup>* cells were tested with a two-way ANOVA and Bonferroni post-hoc tests (\*  $P < 0.05$ , \*\*  $P < 0.001$ , \*\*\*  $P < 0.0001$ ). Average data is depicted as mean  $\pm$  SEM. (**C**) Example current traces of *hsElkin1* iso3 (green) and *mmElkin1* (blue). Note that example traces have different y-axes. (**D**) GFP (black), *mmPiezo2* (orange), *hsElkin1* iso1 (magenta) and iso3 (green) were overexpressed in *N2a<sup>Piezo1-/-</sup>* cells. Cells were clamped at -60mV and exposed to cell indentation. No currents were evoked in cells expressing GFP, all cells expressing *mmPiezo2* responded to indentation but mechanically-evoked currents could be measured in cells expressing *hsElkin1* iso1 or iso3. (**E**) Percentage of transfected *N2a<sup>Piezo1-/-</sup>* cells that responded to membrane indentation. The numbers in bars indicate the number of cells tested.
