# Supplementary material for: TMEM87a/Elkin1, a component of a novel mechanoelectrical transduction pathway, modulates melanoma adhesion and migration
Source: eLife journal article supplement (doi:10.7554/elife.53308), 2020-03-31
Supplement: supp [file elife-53308-supp-v1.zip › elife_poa_e53308_Figure_3_figure_supplement_2.pdf]

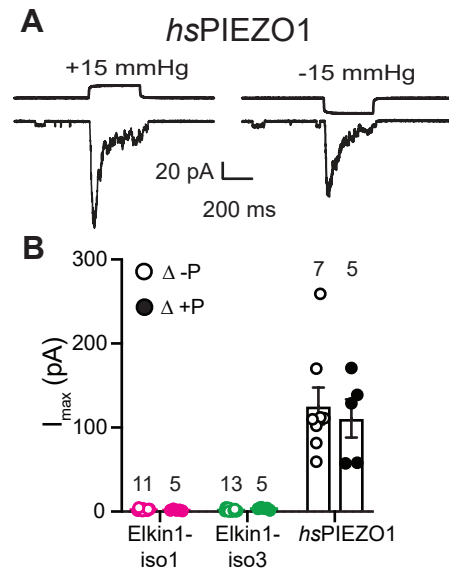

**Figure 3- figure supplement 2: High speed pressure clamp recordings in cells expressing *hsPIEZO1***

(A) Example traces of cell attached patch clamp recordings of PIEZO1 expressed in HEK-293T cells: positive and negative pressure stimuli were applied. (B) Maximal current amplitude of stretch-activated currents. Data are presented as mean  $\pm$  s.e.m. with individual data points overlayed. Open circles: negative pressure, closed circles: positive pressure.
