# Supplementary material for: TMEM87a/Elkin1, a component of a novel mechanoelectrical transduction pathway, modulates melanoma adhesion and migration
Source: eLife journal article supplement (doi:10.7554/elife.53308), 2020-03-31
Supplement: supp [file elife-53308-supp-v1.zip › elife_poa_e53308_Figure_4_figure_supplement_1.pdf]

**A**

|               |     |                                                              |
|---------------|-----|--------------------------------------------------------------|
| hsElkin1_iso1 | 1   | MAAAAWLQVLPVILLLLGAHPSPLSFFSAGPATVAAADRSKWHIPIPSGKNYFSFGKILF |
| hsElkin1_iso3 | 1   | MAHSDT-----                                                  |
| mmElkin1_iso1 | 1   | MAVAAWLQVSPVIFLLLGAQFPPLSFLGAGPAPVFAADRSKWHIMPSPGKGYFNFGKILF |
| hsElkin1_iso1 | 61  | RNTTIFLKFDGEPCLSLNITWYLSKADCYNEIYNFKAEEVELYLEKLEKRLSGSKYQT   |
| hsElkin1_iso3 | 7   | -----VVDGEPCLSLNITWYLSKADCYNEIYNFKAEEVELYLEKLEKRLSGSKYQT     |
| mmElkin1_iso1 | 61  | RNTTILLKFDGEPCLSLNITWYLSKADCYNEIYNFKADEESYLENLKLEKRLSGRYQT   |
| hsElkin1_iso1 | 121 | SSKLFQNCSELFKTQTTFSGDFMHLPLLGKQEKENGNTNLTFTIGDKTAMHEPLQTWQDA |
| hsElkin1_iso3 | 60  | SSKLFQNCSELFKTQTTFSGDFMHLPLLGKQEKENGNTNLTFTIGDKTAMHEPLQTWQDA |
| mmElkin1_iso1 | 121 | SSRLFQNCSELYKAQSFSGDFTHLPLLGKQEKENATNVTFTIGDKIAMHEPLQTWQDA   |
| hsElkin1_iso1 | 181 | PYIFIVHIGISSSKESKENSLSNLFMTTVEVKGPYEYLTLEDYPLMIFFMVMCIVYVLF  |
| hsElkin1_iso3 | 120 | PYIFIVHIGISSSKESKENSLSNLFMTTVEVKGPYEYLTLEDYPLMIFFMVMCIVYVLF  |
| mmElkin1_iso1 | 181 | PYIFIVHIGISSSKESKENSLSNLFMTTVEVKGPYEYLTLEDYPLMIFFMVMCIVYVLF  |
| hsElkin1_iso1 | 241 | GVLWLAWSAACYWRDLLRIQFWIGAVIFLGMIEKAVFYAEFQNIYKGESVQCALILAELL |
| hsElkin1_iso3 | 180 | GVLWLAWSAACYWRDLLRIQFWIGAVIFLGMIEKAVFYAEFQNIYKGESVQCALILAELL |
| mmElkin1_iso1 | 241 | GVLWLAWSAACYWRDLLRIQFWIGAVIFLGMIEKAVFYAEFQNIYKGESVQCALILAELL |
| hsElkin1_iso1 | 301 | SAVKRSLARTLVIIVSLGYGIVKPRLGVTLHKVVVAGALYLLFSGMEGVLRVTGAQTDLA |
| hsElkin1_iso3 | 240 | SAVKRSLARTLVIIVSLGYGIVKPRLGVTLHKVVVAGALYLLFSGMEGVLRVTGAQTDLA |
| mmElkin1_iso1 | 301 | SAVKRSLARTLVIIVSLGYGIVKPRLGVTLHKVVVAGALYLLFSGMEGVLRVTGAQTDLA |
| hsElkin1_iso1 | 361 | SLAFIPLAFLDTALCWWIFISLTQTMKLLKLRNIVKLSLYRHFTNTLILAVAASIVFII  |
| hsElkin1_iso3 | 300 | SLAFIPLAFLDTALCWWIFISLTQTMKLLKLRNIVKLSLYRHFTNTLILAVAASIVFII  |
| mmElkin1_iso1 | 361 | SLAFIPLAFLDTALCWWIFISLTQTMKLLKLRNIVKLSLYRHFTNTLILAVAASIVFII  |
| hsElkin1_iso1 | 421 | WTTMKFRIVTCQSDWRELWVDDAIWRLLFSMILFVIMVLWRPSANNQRFASFPLSEEEEE |
| hsElkin1_iso3 | 360 | WTTMKFRIVTCQSDWRELWVDDAIWRLLFSMILFVIMVLWRPSANNQRFASFPLSEEEEE |
| mmElkin1_iso1 | 421 | WTTMKFRIVTCQSDWRELWVDDAIWRLLFSMILFVIMVLWRPSANNQRFASFPLSEEEEE |
| hsElkin1_iso1 | 481 | DEQKEPMLKESFEGMKMRSTKQEPNGNSKVNKAQEDDLKWVEENVPSSVTDVALPALDLS |
| hsElkin1_iso3 | 420 | DEQKEPMLKESFEGMKMRSTKQEPNGNSKVNKAQEDDLKWVEENVPSSVTDVALPALDLS |
| mmElkin1_iso1 | 481 | DEQKEPMLKESFEGMKMRSTKQEPNGNSKVNKAQEDDLKWVEENVPSSVTDVALPALDLS |
| hsElkin1_iso1 | 541 | DEERMITHFERSKME                                              |
| hsElkin1_iso3 | 480 | DEERMITHFERSKME                                              |
| mmElkin1_iso1 | 541 | DEERMITHFERSKME                                              |

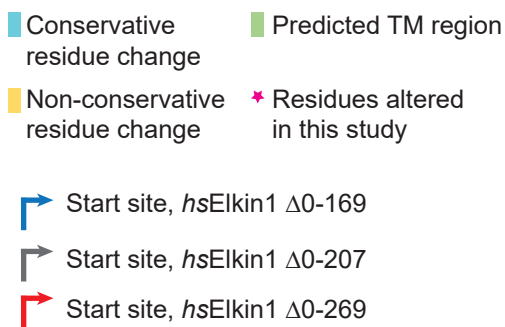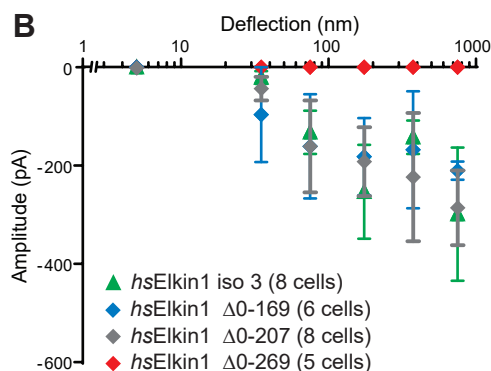

**Figure 4- figure supplement 1: Sequence alignment of human and mouse Elkin1 protein and the effect of N-terminal deletions on *hsElkin1* function**

(A) Sequence alignment of the human (*hs*) Elkin1-iso1 and -iso3 against the mouse (*mm*) Elkin1 protein. The predicted transmembrane regions are marked with green, conservative residue variations in teal and non-conservative residue variations in yellow. The two residues that have been studied here are marked with a magenta star. Arrows indicate the start site for cloned truncation proteins. (B) Stimulus-response curve analysis of *hsElkin1*-iso3 versus *hsElkin1* truncation mutants. Note that function is only lost once the first predicted TM domain is disrupted.
