# Supplementary material for: TMEM87a/Elkin1, a component of a novel mechanoelectrical transduction pathway, modulates melanoma adhesion and migration
Source: eLife journal article supplement (doi:10.7554/elife.53308), 2020-03-31
Supplement: supp [file elife-53308-supp-v1.zip › elife_poa_e53308_Figure_4_figure_supplement_2.pdf]

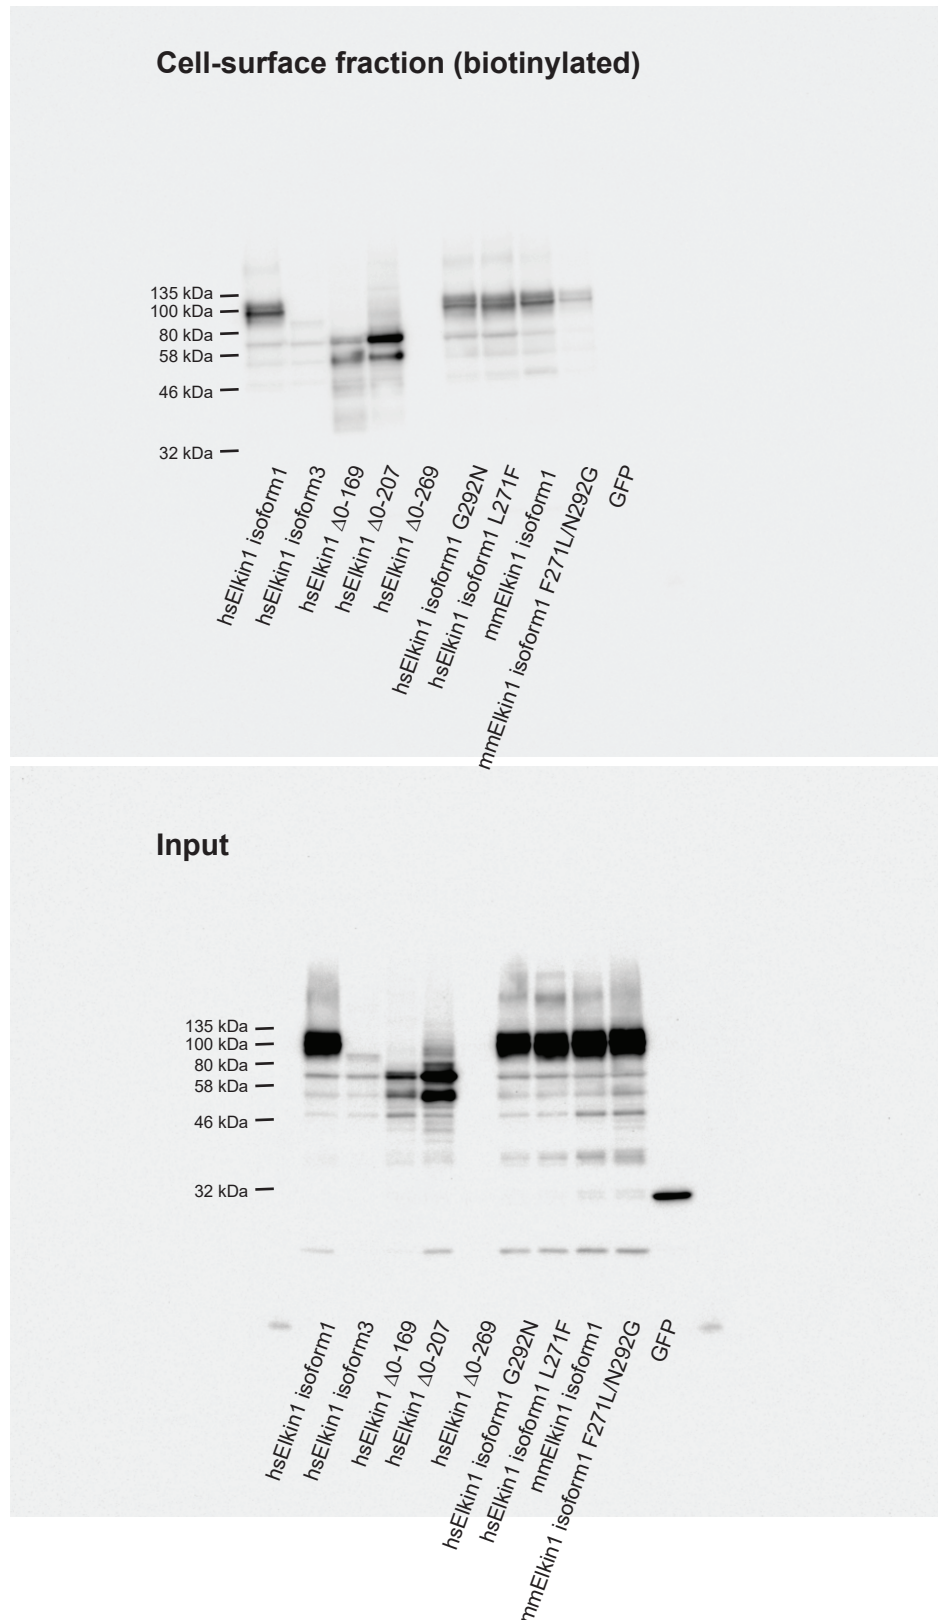

**Figure 4- figure supplement 2: Cell-surface biotinylation of Elkin1-GFP fusion proteins.**

GFP-tagged Elkin1 variants were overexpressed in HEK-293T P1KO cells. Cells were biotinylated and the cell-surface fraction isolated by pulldown of biotinylated proteins using Neutravidin beads. Input samples and the surface fraction were separated using SDS-PAGE, transferred to a PVDF membrane and Elkin-1-GFP fusion proteins were detected using an anti-GFP antibody. Human (*hs*) Elkin1 isoforms 1 and 3 and truncations  $\Delta$ 0-169,  $\Delta$ 0-207 were all detected in the plasma membrane. The Elkin1-iso1 mouse (*mm*) variant, and the mutated *hs* variants (G292N and L271F) that did not respond efficiently to deflection stimuli were still present in the plasma membrane fraction, as was the mouse variant F271L, N292G. As such, the differences in mechanically activated currents that depend on these isoforms cannot be explained by a change in localisation of the protein. In contrast, the lack of activity of the human  $\Delta$ 0-269 variant can be attributed to a lack of stability of the protein, as this variant is no longer detected in the input samples, or the plasma membrane
