# Supplementary material for: TMEM87a/Elkin1, a component of a novel mechanoelectrical transduction pathway, modulates melanoma adhesion and migration
Source: eLife journal article supplement (doi:10.7554/elife.53308), 2020-03-31
Supplement: supp [file elife-53308-supp-v1.zip › elife_poa_e53308_Figure_6_figure_supplement_1.pdf]

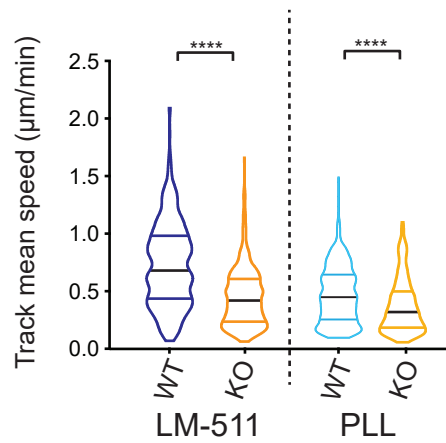

**Figure 6- figure supplement 1: GFP-expressing Elkin1-KO cells exhibit decreased migration on 2D substrates, in comparison with WT controls**

The WM266-4 Elkin1-KO cells expressing cytoplasmic-GFP exhibited a significant decrease in mean track speed in comparison with similarly labelled WM266-4 WT clones on LM-511 (Mann-Whitney, WT = 419 tracks, Elkin1-KO = 435 tracks, \*\*\*\* $P < 0.0001$ ), 38% reduction in the mean of the Elkin1-KO track mean speed. The track mean speed was also decrease in the WM266-4 Elkin1-KO cells expressing GFP on PLL, in comparison with WT controls (Mann-Whitney, WT = 458 tracks, Elkin1-KO = 275 tracks, \*\*\*\* $P < 0.0001$ ), 21% reduction in the mean of the Elkin1-KO track mean speed.
