# Supplementary material for: TMEM87a/Elkin1, a component of a novel mechanoelectrical transduction pathway, modulates melanoma adhesion and migration
Source: eLife journal article supplement (doi:10.7554/elife.53308), 2020-03-31
Supplement: supp [file elife-53308-supp-v1.zip › elife_poa_e53308_Figure_7_figure_supplement_1.pdf]

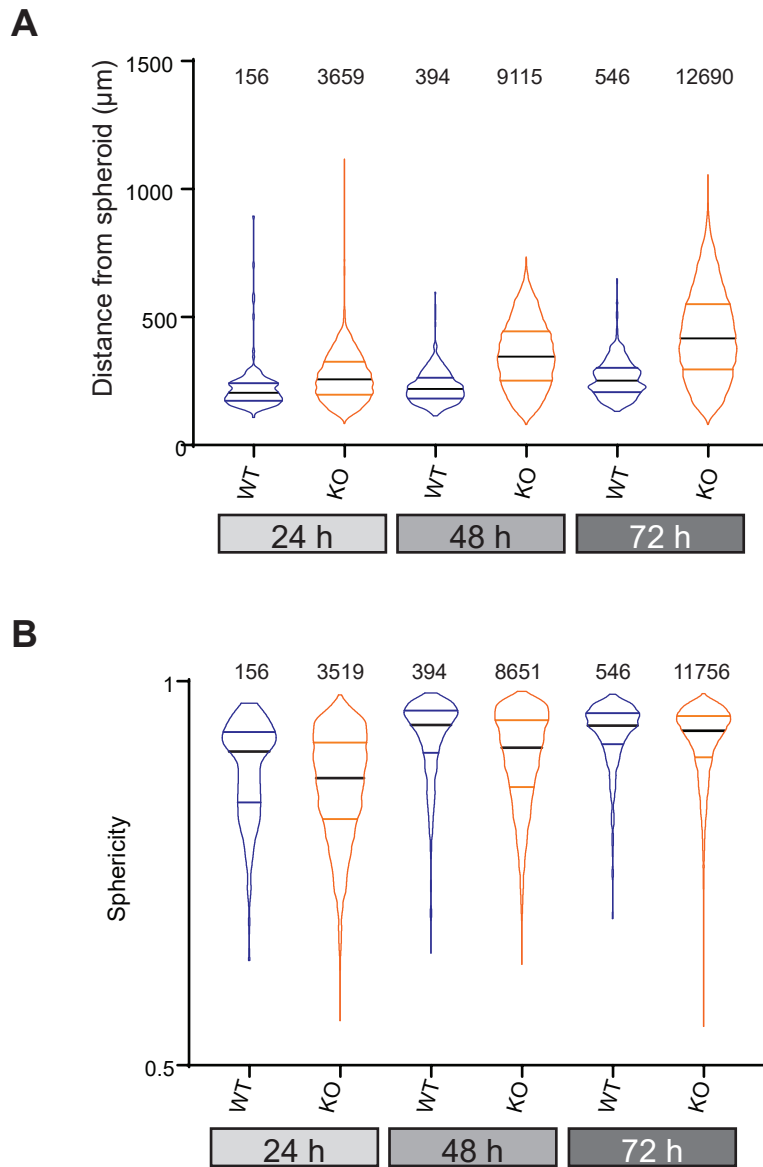

**Figure 7- figure supplement 1 Data from all individual cells invading collagen gels from organotypic spheroids. (A)** Distance from spheroid at each time point for each cell and **(B)** sphericity of each cell at the given time point. data are presented as violin plots, black mid-line represents the median, coloured lines the quartiles.
