# Supplementary material for: TMEM87a/Elkin1, a component of a novel mechanoelectrical transduction pathway, modulates melanoma adhesion and migration
Source: eLife journal article supplement (doi:10.7554/elife.53308), 2020-03-31
Supplement: supp [file elife-53308-supp-v1.zip › elife_poa_e53308_Figure_7_figure_supplement_2.pdf]

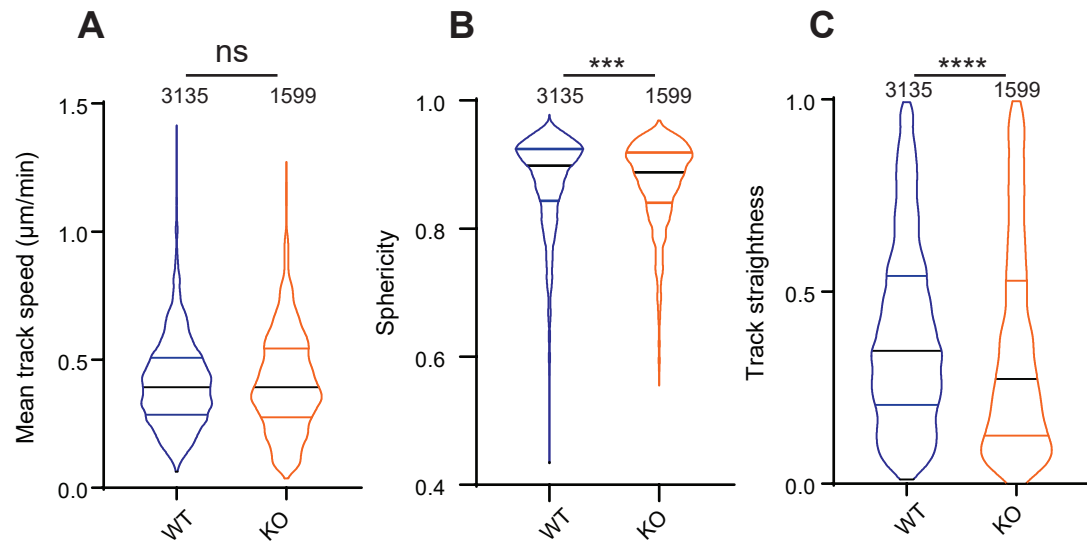

**Figure 7- figure supplement 2: The effect of Elkin1 deletion on migration in 3D collagen gels**

(A) The mean track speed of WT and Elkin1-KO clones in 3D collagen gel was not significantly different (Mann-Whitney, WT = 3135 tracks, Elkin1-KO = 1599 tracks,  $P = 0.65$ ). (B) However, the Elkin1-KO cells exhibit a less spherical (more elongated) morphology over the course of the experiment (Mann-Whitney, WT = 3135 measurements, Elkin1-KO = 1599 measurements, \*\*\*  $P = 0.0006$ ). (C) The straightness of the Elkin1-KO tracks was reduced in comparison with WT tracks (Mann-Whitney, WT = 3135 tracks, Elkin1-KO = 1599 tracks, \*\*\*\*  $P < 0.0001$ ). Data displayed as violin plots (center line, median).
