# Supplementary material for: TMEM87a/Elkin1, a component of a novel mechanoelectrical transduction pathway, modulates melanoma adhesion and migration
Source: eLife journal article supplement (doi:10.7554/elife.53308), 2020-03-31
Supplement: supp [file elife-53308-supp-v1.zip › elife_poa_e53308_Figure_8_figure_supplement_1.pdf]

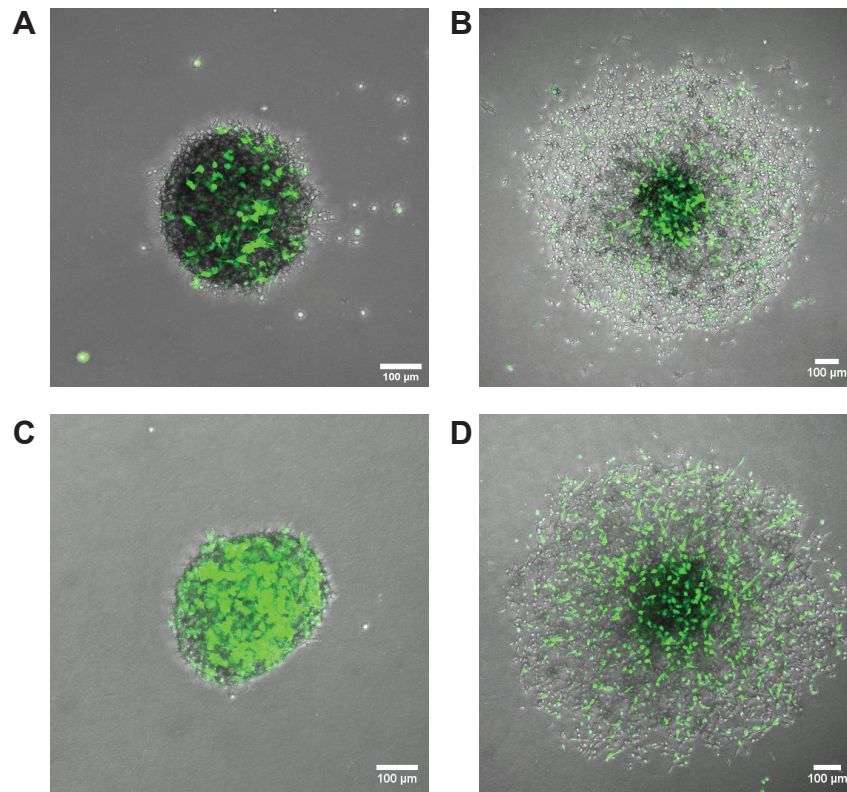

**Figure 8- figure supplement 1: Overexpression of Elkin1-L210F does not rescue the partitioning phenotype in chimeric spheroids.**

Representative images of chimeric spheroids formed from equal numbers of unlabelled WM266-4 Elkin1-KO cells and Elkin1-KO cells stably expressing either *hsElkin1-iso3* (A, B) or *hsElkin1-iso3-L210F* (C, D). Cells expressing either Elkin1 variant also co-expressed GFP (coloured green in figure). At  $t = 0$  h post-implantation (A, C) cells had not yet partitioned. At  $t = 48$  h post implantation (B, D) the cells expressing *hsElkin1-iso3* were more likely to be found in the core, whereas cells expressing *hsElkin1-L210F* were distributed throughout the spheroid. Similar observations were made in 6 spheroids (*hsElkin1-iso3*) and 9 spheroids (*hsElkin1-iso3-L210F*) over two independent experiments. Scale bars 100  $\mu\text{m}$ .
