# Supplementary material for: TMEM87a/Elkin1, a component of a novel mechanoelectrical transduction pathway, modulates melanoma adhesion and migration
Source: eLife journal article supplement (doi:10.7554/elife.53308), 2020-03-31
Supplement: supp [file elife-53308-supp-v1.zip › elife_poa_e53308_Supplementary_file_1.xlsx]

## Sheet: Sheet2
Table S2: Proteins identified in WM266-4 cells
Gene names	Protein names
SAFB	Scaffold attachment factor B1
TTC26	Tetratricopeptide repeat protein 26
ADAM9	Disintegrin and metalloproteinase domain-containing protein 9
UBA6	Ubiquitin-like modifier-activating enzyme 6
PLEKHA5	Pleckstrin homology domain-containing family A member 5
KIAA1598	Shootin-1
ILVBL	Acetolactate synthase-like protein
C17orf89	Uncharacterized protein C17orf89
PLEKHG3	Pleckstrin homology domain-containing family G member 3
SH3PXD2B	SH3 and PX domain-containing protein 2B
ACO2	Aconitate hydratase, mitochondrial
STMN1	Stathmin
RALGAPB	Ral GTPase-activating protein subunit beta
GGT7;GGTL3	Gamma-glutamyltransferase 7;Gamma-glutamyltransferase 7 heavy chain;Gamma-glutamyltransferase 7 light chain
C20orf43	UPF0549 protein C20orf43
C20orf4	Uncharacterized protein C20orf4
PRNP	Major prion protein
ADD1	Alpha-adducin
PSMB9	Proteasome subunit beta type-9;Proteasome subunit beta type
TRIM26	Tripartite motif-containing protein 26
HLA-DPB1	HLA class II histocompatibility antigen, DP beta 1 chain
MPG;PIG16	DNA-3-methyladenine glycosylase
NBAS	Neuroblastoma-amplified sequence
TARSL2	Probable threonine--tRNA ligase 2, cytoplasmic
AGPHD1	Aminoglycoside phosphotransferase domain-containing protein 1
EXOSC2	Exosome complex component RRP4
KIAA0564	Uncharacterized protein KIAA0564
SBNO1	Protein strawberry notch homolog 1
IMPDH1	Inosine-5-monophosphate dehydrogenase;Inosine-5-monophosphate dehydrogenase 1
GTPBP10	GTP-binding protein 10
WDR91	WD repeat-containing protein 91
UNC84A;SUN1	SUN domain-containing protein 1
ING4	Inhibitor of growth protein 4
VPS37C	Vacuolar protein sorting-associated protein 37C
ABCB8	ATP-binding cassette sub-family B member 8, mitochondrial
C5orf44	UPF0533 protein C5orf44
CNOT1	CCR4-NOT transcription complex subunit 1
ARHGEF35	Rho guanine nucleotide exchange factor 35
RAB3GAP1	Rab3 GTPase-activating protein catalytic subunit
FCRLA	Fc receptor-like A
BST1	ADP-ribosyl cyclase 2
CNTNAP3B;CNTNAP3	Contactin-associated protein-like 3B;Contactin-associated protein-like 3
TSSC4	Protein TSSC4
MAP1LC3B2;MAP1LC3B	Microtubule-associated proteins 1A/1B light chain 3 beta 2;Microtubule-associated proteins 1A/1B light chain 3B
MRPL42	39S ribosomal protein L42, mitochondrial
HS2ST1	Heparan sulfate 2-O-sulfotransferase 1
PGP	Phosphoglycolate phosphatase
C5orf51	UPF0600 protein C5orf51
MAGOHB	Protein mago nashi homolog 2
HCFC1	Host cell factor 1
PIGK	GPI-anchor transamidase
ZNF281	Zinc finger protein 281
POLR2J2;POLR2J3;POLR2J1;POLR2J	DNA-directed RNA polymerase II subunit RPB11-a;DNA-directed RNA polymerase II subunit RPB11-b1;DNA-directed RNA polymerase II subunit RPB11-b2
ABI1	Abl interactor 1
FAM115C	Protein FAM115C
SEPT8	Septin-8
DTNBP1	Dysbindin
NUDT5	ADP-sugar pyrophosphatase
WBP2	WW domain-binding protein 2
C10orf11	Leucine-rich repeat-containing protein C10orf11
PRCC	Proline-rich protein PRCC
YIF1A	Protein YIF1A
ZMYM3	Zinc finger MYM-type protein 3
BTD	Biotinidase
TUBAL3	Tubulin alpha chain-like 3
FBLL1	rRNA/tRNA 2-O-methyltransferase fibrillarin-like protein 1
SMCHD1	Structural maintenance of chromosomes flexible hinge domain-containing protein 1
GNAS	Guanine nucleotide-binding protein G(s) subunit alpha isoforms XLas;Guanine nucleotide-binding protein G(s) subunit alpha isoforms short
UNC119B	Protein unc-119 homolog B
PHKA1	Phosphorylase b kinase regulatory subunit alpha, skeletal muscle isoform
DOCK11	Dedicator of cytokinesis protein 11
METTL15	Probable methyltransferase-like protein 15
USP14	Ubiquitin carboxyl-terminal hydrolase 14;Ubiquitin carboxyl-terminal hydrolase
MRPL23	39S ribosomal protein L23, mitochondrial
NOC3L	Nucleolar complex protein 3 homolog
MAP2K5	Dual specificity mitogen-activated protein kinase kinase 5
CCDC85C	Coiled-coil domain-containing protein 85C
PAIP1	Polyadenylate-binding protein-interacting protein 1
RENBP	N-acylglucosamine 2-epimerase
LOC105518657	Putative tubulin beta chain-like protein ENSP00000290377
SKT	Sickle tail protein homolog
BGN	Biglycan
CNIH4	Protein cornichon homolog 4
MSL3;MSL3P1	Male-specific lethal 3 homolog;Putative male-specific lethal-3 protein-like 2
SCP2	Non-specific lipid-transfer protein
CD81	CD81 antigen
DIAPH2	Protein diaphanous homolog 2
POLA1	DNA polymerase;DNA polymerase alpha catalytic subunit
ENSA	Alpha-endosulfine
OBSL1	Obscurin-like protein 1
CRYZ	Quinone oxidoreductase
CD9	CD9 antigen
ZWINT	ZW10 interactor
AMOT	Angiomotin
SOX10;SOX9;SOX8	Transcription factor SOX-10;Transcription factor SOX-9;Transcription factor SOX-8
RBCK1	RanBP-type and C3HC4-type zinc finger-containing protein 1
AIF1L	Allograft inflammatory factor 1-like
PPP2R4	Serine/threonine-protein phosphatase 2A activator
MB21D1	Protein MB21D1
CRELD2	Cysteine-rich with EGF-like domain protein 2
DNASE1L1	Deoxyribonuclease-1-like 1
FAM127A;FAM127B;FAM127C	Protein FAM127A;Protein FAM127B;Protein FAM127C
KIAA0913	Zinc finger SWIM domain-containing protein KIAA0913
CORO1C	Coronin-1C
RDX	Radixin
POM121C;POM121	Nuclear envelope pore membrane protein POM 121C;Nuclear envelope pore membrane protein POM 121
ITSN1	Intersectin-1
ZYG11B	Protein zyg-11 homolog B
ZBTB8OS	Protein archease
AER61	Uncharacterized glycosyltransferase AER61
EFCAB7	EF-hand calcium-binding domain-containing protein 7
IST1	IST1 homolog
FMR1	Fragile X mental retardation protein 1
ATPAF1	ATP synthase mitochondrial F1 complex assembly factor 1
GSK3A	Glycogen synthase kinase-3 alpha
PDPR	Pyruvate dehydrogenase phosphatase regulatory subunit, mitochondrial
STRA13	Centromere protein X
AZGP1	Putative zinc-alpha-2-glycoprotein-like 1
DSCR3	Down syndrome critical region protein 3
RBBP8	DNA endonuclease RBBP8
SUMO3;SUMO2;SUMO4	Small ubiquitin-related modifier 3;Small ubiquitin-related modifier 2;Small ubiquitin-related modifier 4
TUBA4A	Tubulin alpha-4A chain
TSSC1	Protein TSSC1
RPL23A	60S ribosomal protein L23a
IKBKG	NF-kappa-B essential modulator
DBN1	Drebrin
NPRL3	Nitrogen permease regulator 3-like protein
C3orf17	Uncharacterized protein C3orf17
BICD1	Protein bicaudal D homolog 1
ALDOC	Fructose-bisphosphate aldolase C;Fructose-bisphosphate aldolase
PLRG1	Pleiotropic regulator 1
SNRPG	Small nuclear ribonucleoprotein G-like protein;Small nuclear ribonucleoprotein G
CDH2	Cadherin-2
SYNRG	Synergin gamma
WDR47	WD repeat-containing protein 47
MYOM1	Myomesin-1
ERCC2	TFIIH basal transcription factor complex helicase XPD subunit
SNX24	Sorting nexin-24
RABL2A;RABL2B	Rab-like protein 2A;Rab-like protein 2B
MFSD12	Major facilitator superfamily domain-containing protein 12
MATR3	Matrin-3
PTTG1IP	Pituitary tumor-transforming gene 1 protein-interacting protein
LRRFIP2	Leucine-rich repeat flightless-interacting protein 2
NUDT19	Nucleoside diphosphate-linked moiety X motif 19, mitochondrial
STX4	Syntaxin-4
DCTN1	Dynactin subunit 1
BCKDK	[3-methyl-2-oxobutanoate dehydrogenase [lipoamide]] kinase, mitochondrial
SHMT1	Serine hydroxymethyltransferase, cytosolic;Serine hydroxymethyltransferase
RAB34	Ras-related protein Rab-34
PIK3C3	Phosphatidylinositol 3-kinase catalytic subunit type 3
DRG2	Developmentally-regulated GTP-binding protein 2
MBP	Myelin basic protein
MIF4GD	MIF4G domain-containing protein
SRRM1	Serine/arginine repetitive matrix protein 1
FER1L4	Fer-1-like protein 4
KIAA0930	Uncharacterized protein KIAA0930
CACNA1D	Voltage-dependent L-type calcium channel subunit alpha-1D
SREBF1;SREBP-1a (delta)	Sterol regulatory element-binding protein 1;Processed sterol regulatory element-binding protein 1
FAM118A	Protein FAM118A
CSNK1E	Casein kinase I isoform epsilon
MKL1	MKL/myocardin-like protein 1
EIF3EIP;EIF3L	Eukaryotic translation initiation factor 3 subunit L
CCDC117	Coiled-coil domain-containing protein 117
TBC1D22A	TBC1 domain family member 22A
EWSR1	RNA-binding protein EWS
RBFOX2;RBM9;RBFOX1	RNA binding protein fox-1 homolog 2;RNA binding protein fox-1 homolog 1
KDM5C;JARID1C;KDM5D	Lysine-specific demethylase 5C;Lysine-specific demethylase 5D
BRD2	Bromodomain-containing protein 2
FAM50A	Protein FAM50A
BAG6;BAT3	Large proline-rich protein BAG6
EHMT2	Histone-lysine N-methyltransferase EHMT2
VARS	Valine--tRNA ligase
FLOT1	Flotillin-1
TAP2	Antigen peptide transporter 2
ARCN1	Coatomer subunit delta
ASCC2
HMOX1	Heme oxygenase 1
NHP2L1	NHP2-like protein 1
SEPT3	Neuronal-specific septin-3
PSMD10	26S proteasome non-ATPase regulatory subunit 10
HMGCL	Hydroxymethylglutaryl-CoA lyase, mitochondrial
MAD2L2	Mitotic spindle assembly checkpoint protein MAD2B
RASAL2	Ras GTPase-activating protein nGAP
CROCC	Rootletin
NRD1	Nardilysin
OSBPL9	Oxysterol-binding protein;Oxysterol-binding protein-related protein 9
EIF4ENIF1	Eukaryotic translation initiation factor 4E transporter
NFIA	Nuclear factor 1 A-type;Nuclear factor 1
KIFAP3	Kinesin-associated protein 3
UQCC	Ubiquinol-cytochrome c reductase complex chaperone CBP3 homolog
MRPL43	39S ribosomal protein L43, mitochondrial
SMG7	Protein SMG7
ARPC5	Actin-related protein 2/3 complex subunit 5
ARHGEF7	Rho guanine nucleotide exchange factor 7
LPHN2	Latrophilin-2
SYT6	Synaptotagmin-6
SEPT6	Septin-6
EXOSC1	Exosome complex component CSL4
CD58	Lymphocyte function-associated antigen 3
MCOLN3	Mucolipin-3
GUK1	Guanylate kinase
FAF1	FAS-associated factor 1
PABPC4	Polyadenylate-binding protein 4
CD55;DAF	Complement decay-accelerating factor
SOAT1	Sterol O-acyltransferase 1
EYA3	Eyes absent homolog 3
NIT1	Nitrilase homolog 1
NUF2	Kinetochore protein Nuf2
MAGOH;MAGOHB	Protein mago nashi homolog
EPS15	Epidermal growth factor receptor substrate 15
CLK2	Dual specificity protein kinase CLK2
PSAP	Proactivator polypeptide;Saposin-A;Saposin-B-Val;Saposin-B;Saposin-C;Saposin-D
TAP1	Antigen peptide transporter 1
GRIPAP1	GRIP1-associated protein 1
N-TAF1;TAF1	Transcription initiation factor TFIID subunit 1
RANBP9	Ran-binding protein 9
MYO9A	Unconventional myosin-IXa
JMJD6	Bifunctional arginine demethylase and lysyl-hydroxylase JMJD6
DOCK10;DOCK10.2	Dedicator of cytokinesis protein 10
NAP1L1	Nucleosome assembly protein 1-like 1
PHF3	PHD finger protein 3
PHC2	Polyhomeotic-like protein 2
MAN1B1	Endoplasmic reticulum mannosyl-oligosaccharide 1,2-alpha-mannosidase
TRADD	Tumor necrosis factor receptor type 1-associated DEATH domain protein
C20orf7	Probable methyltransferase C20orf7, mitochondrial
WBSCR22
SLC25A46	Solute carrier family 25 member 46
ZKSCAN1	Zinc finger protein with KRAB and SCAN domains 1
ERCC1	DNA excision repair protein ERCC-1
HDAC2	Histone deacetylase 2;Histone deacetylase
EIF3S3;EIF3H	Eukaryotic translation initiation factor 3 subunit H
EIF3F	Eukaryotic translation initiation factor 3 subunit F
ADCY3	Adenylate cyclase type 3
UVRAG	UV radiation resistance-associated gene protein
MRE11A	Double-strand break repair protein MRE11A
MORF4L1	Mortality factor 4-like protein 1
PRMT10	Putative protein arginine N-methyltransferase 10
NADSYN1	Glutamine-dependent NAD(+) synthetase
NAP1L1	Nucleosome Assembly Protein 1 Like 1
UXS1	UDP-glucuronic acid decarboxylase 1
PHF23	PHD finger protein 23
SNRPN;SNRPB	Small nuclear ribonucleoprotein-associated protein;Small nuclear ribonucleoprotein-associated proteins B and B;Small nuclear ribonucleoprotein-associated protein N
AP1G1	AP-1 complex subunit gamma-1
RXRA	Retinoic acid receptor RXR-alpha
CDIPT	CDP-diacylglycerol--inositol 3-phosphatidyltransferase
STK3	Serine/threonine-protein kinase 3;Serine/threonine-protein kinase 3 36kDa subunit;Serine/threonine-protein kinase 3 20kDa subunit
ARL6IP4	ADP-ribosylation factor-like protein 6-interacting protein 4
DHFR	Dihydrofolate reductase
CNN2	Calponin-2
ST5	Suppression of tumorigenicity 5 protein
CLPTM1	Cleft lip and palate transmembrane protein 1
XYLB	Xylulose kinase
PRKAG1	5-AMP-activated protein kinase subunit gamma-1
IFIT5	Interferon-induced protein with tetratricopeptide repeats 5
SIRT6	NAD-dependent protein deacetylase sirtuin-6
FER	Tyrosine-protein kinase Fer
HARS2;HARSL	Probable histidine--tRNA ligase, mitochondrial
MON1B	Vacuolar fusion protein MON1 homolog B
MED20;TRFP	Mediator of RNA polymerase II transcription subunit 20
TMEM159	Promethin
VMP1	Vacuole membrane protein 1
TOE1	Target of EGR1 protein 1
CCT8	T-complex protein 1 subunit theta
ZFAND2B	AN1-type zinc finger protein 2B
LPIN1	Phosphatidate phosphatase LPIN1
IFT122	Intraflagellar transport protein 122 homolog
CD33	Myeloid cell surface antigen CD33
NDUFA13	NADH dehydrogenase [ubiquinone] 1 alpha subcomplex subunit 13
EIF2A	Eukaryotic translation initiation factor 2A
NSF	Vesicle-fusing ATPase
DENND5B;DENND5A	DENN domain-containing protein 5A;DENN domain-containing protein 5B
NAPG	Gamma-soluble NSF attachment protein
DEK	Protein DEK
MRPS18B	28S ribosomal protein S18b, mitochondrial
PPA2	pyrophosphatase 2
MRPS25	28S ribosomal protein S25, mitochondrial
NOL3	Nucleolar protein 3
QTRT1	Queuine tRNA-ribosyltransferase
COMMD1	COMM domain-containing protein 1
ACSF2	Acyl-CoA synthetase family member 2, mitochondrial
DYNLRB1;DYNLRB2	Dynein light chain roadblock-type 1;Dynein light chain roadblock-type 2
SMARCE1	SWI/SNF-related matrix-associated actin-dependent regulator of chromatin subfamily E member 1
ATP5SL	ATP synthase subunit s-like protein
CLUAP1	Clusterin-associated protein 1
RPS6KA3	Ribosomal protein S6 kinase alpha-3
PUM1	Pumilio homolog 1
DNAJC11	DnaJ homolog subfamily C member 11
ABCB7	ATP-binding cassette sub-family B member 7, mitochondrial
CANX	Calnexin
ERBB3	Receptor tyrosine-protein kinase erbB-3
DDAH1	N(G),N(G)-dimethylarginine dimethylaminohydrolase 1
MKL2	MKL/myocardin-like protein 2
MAP1S	Microtubule-associated protein 1S;MAP1S heavy chain;MAP1S light chain
MSI2	RNA-binding protein Musashi homolog 2
RABEP2	Rab GTPase-binding effector protein 2
PTBP2	Polypyrimidine tract-binding protein 2
MBD1	Methyl-CpG-binding domain protein 1
CDC25B	M-phase inducer phosphatase 2
COPS2	COP9 signalosome complex subunit 2
EPN3	Epsin-3
TGM2	Protein-glutamine gamma-glutamyltransferase 2
TAMM41	Mitochondrial translocator assembly and maintenance protein 41 homolog
UBE2K	Ubiquitin-conjugating enzyme E2 K
RAB5A	Ras-related protein Rab-5A
ISCA1	Iron-sulfur cluster assembly 1 homolog, mitochondrial
C15orf44	UPF0464 protein C15orf44
SNX10	Sorting nexin-10
SNRPD3	Small nuclear ribonucleoprotein Sm D3
SNX6	Sorting nexin-6
CS	Citrate synthase, mitochondrial;Citrate synthase
PLA2G15	Group XV phospholipase A2
TOP3A	DNA topoisomerase 3-alpha;DNA topoisomerase
USP8	Ubiquitin carboxyl-terminal hydrolase 8;Ubiquitin carboxyl-terminal hydrolase
ECE1	Endothelin-converting enzyme 1
RUFY3	Protein RUFY3
STX5	Syntaxin-5
GORASP2	Golgi reassembly-stacking protein 2
PDSS2	Decaprenyl-diphosphate synthase subunit 2
MLPH	Melanophilin
ATP5C1	ATP synthase subunit gamma, mitochondrial;ATP synthase gamma chain
KIF20A	Kinesin-like protein KIF20A
CDC27	Cell division cycle protein 27 homolog
MTMR10	Myotubularin-related protein 10
HN1L	Hematological and neurological expressed 1-like protein
SLC25A10;MRPL12	39S ribosomal protein L12, mitochondrial
FAP	Seprase
RPS6KB1;RPS6KB2	Ribosomal protein S6 kinase beta-1;Ribosomal protein S6 kinase beta-2
RNF220	E3 ubiquitin-protein ligase RNF220
RPL18A	60S ribosomal protein L18a
BSDC1	BSD domain-containing protein 1
TRAPPC4	Trafficking protein particle complex subunit 4
SLC26A6	Solute carrier family 26 member 6
FANCL	E3 ubiquitin-protein ligase FANCL
MRPL48	39S ribosomal protein L48, mitochondrial
RBMS1	RNA-binding motif, single-stranded-interacting protein 1
SRSF2;SFRS2	Serine/arginine-rich splicing factor 2
STRAP	Serine-threonine kinase receptor-associated protein
GNPAT	Dihydroxyacetone phosphate acyltransferase
ACY1	Aminoacylase-1
PTGES3	Prostaglandin E synthase 3
WDR77	Methylosome protein 50
SMN1	Survival motor neuron protein
MKRN2	Probable E3 ubiquitin-protein ligase makorin-2
SNX11	Sorting nexin-11
ZAK	Mitogen-activated protein kinase kinase kinase 20
ACADSB	Short/branched chain specific acyl-CoA dehydrogenase, mitochondrial
TRA2A	Transformer-2 protein homolog alpha
PGD	6-phosphogluconate dehydrogenase, decarboxylating
ZC3H12C	Probable ribonuclease ZC3H12C
HIST2H2BF;HIST1H2BK;H2BFS;HIST1H2BD;HIST1H2BC;HIST1H2BH;HIST1H2BN;HIST1H2BM;HIST1H2BL;HIST1H2BA	Histone H2B;Histone H2B type 1-K;Histone H2B type F-S;Histone H2B type 1-D;Histone H2B type 1-C/E/F/G/I;Histone H2B type 2-F;Histone H2B type 1-H;Histone H2B type 1-N;Histone H2B type 1-M;Histone H2B type 1-L;Histone H2B type 1-A
SEC61A1	Protein transport protein Sec61 subunit alpha isoform 1
STK24	Serine/threonine-protein kinase 24;Serine/threonine-protein kinase 24 36 kDa subunit;Serine/threonine-protein kinase 24 12 kDa subunit
PLOD1	Procollagen-lysine,2-oxoglutarate 5-dioxygenase 1
ELMO2	Engulfment and cell motility protein 2
CHM	Rab proteins geranylgeranyltransferase component A 1
BRAP	BRCA1-associated protein
KIAA0528	Uncharacterized protein KIAA0528
MRPS27	28S ribosomal protein S27, mitochondrial
VDR	Vitamin D3 receptor
ALG3	Dol-P-Man:Man(5)GlcNAc(2)-PP-Dol alpha-1,3-mannosyltransferase
TXNDC15	Thioredoxin domain-containing protein 15
SRPK1	SRSF protein kinase 1
PCDHB11	Protocadherin beta-11
RNGTT	mRNA-capping enzyme;Polynucleotide 5-triphosphatase;mRNA guanylyltransferase
PTPN1	Tyrosine-protein phosphatase non-receptor type 1
PTBP2	Polypyrimidine Tract Binding Protein 2
TTC3	E3 ubiquitin-protein ligase TTC3
FUBP1	Far upstream element-binding protein 1
NUP54	Nucleoporin p54
DPF2	Zinc finger protein ubi-d4
DLD	Dihydrolipoyl dehydrogenase, mitochondrial;Dihydrolipoyl dehydrogenase
MPDU1	Mannose-P-dolichol utilization defect 1 protein
ANXA7	Annexin A7;Annexin
HNRNPD	Heterogeneous nuclear ribonucleoprotein D0
ARHGEF10L	Rho guanine nucleotide exchange factor 10-like protein
PLSCR1	Phospholipid scramblase 1
LSM14A	Protein LSM14 homolog A
RASA1	Ras GTPase-activating protein 1
ERBB2	Receptor tyrosine-protein kinase erbB-2
LIG1	DNA ligase 1;DNA ligase
ADAM10	ADAM Metallopeptidase Domain 10
MTAP	S-methyl-5-thioadenosine phosphorylase
CCT3	T-complex protein 1 subunit gamma
AHSA1	Activator of 90 kDa heat shock protein ATPase homolog 1
BPNT1	3(2),5-bisphosphate nucleotidase 1
TRMT6	tRNA (adenine(58)-N(1))-methyltransferase non-catalytic subunit TRM6
METAP2	Methionine aminopeptidase 2;Methionine aminopeptidase
OSBPL5	Oxysterol-binding protein-related protein 5;Oxysterol-binding protein
ELAVL1	ELAV-like protein 1
ANXA11	Annexin A11;Annexin
EIF3D	Eukaryotic translation initiation factor 3 subunit D
NR2C2AP	Nuclear receptor 2C2-associated protein
NUBPL	Iron-sulfur protein NUBPL
HACL1;PHYH2	2-hydroxyacyl-CoA lyase 1
USP3	Ubiquitin carboxyl-terminal hydrolase 3;Ubiquitin carboxyl-terminal hydrolase
ARL1	ADP-ribosylation factor-like protein 1
FDXR	NADPH:adrenodoxin oxidoreductase, mitochondrial
SF1	Steroidogenic factor 1
PBK	Lymphokine-activated killer T-cell-originated protein kinase
SOS1	Son of sevenless homolog 1
BRD9	Bromodomain-containing protein 9
UTP15	U3 small nucleolar RNA-associated protein 15 homolog
HNRNPC;HNRNPCL1	Heterogeneous nuclear ribonucleoproteins C1/C2;Heterogeneous nuclear ribonucleoprotein C-like 1
ZCCHC17	Nucleolar protein of 40 kDa
GNS	N-acetylglucosamine-6-sulfatase
HDAC6	Histone deacetylase 6
COPB2	Coatomer subunit beta
DYNC1LI2	Cytoplasmic dynein 1 light intermediate chain 2
FAM82B	Regulator of microtubule dynamics protein 1
RPE	Ribulose-phosphate 3-epimerase
NGFR	Tumor necrosis factor receptor superfamily member 16
PHF6	PHD finger protein 6
TRAM1	Translocating chain-associated membrane protein 1
MAPK14	Mitogen-activated protein kinase 14
VARS2	Valine--tRNA ligase, mitochondrial
TRPC4AP	Short transient receptor potential channel 4-associated protein
LRCH3	Leucine-rich repeat and calponin homology domain-containing protein 3
ATE1	Arginyl-tRNA--protein transferase 1
EIF4E2	Eukaryotic translation initiation factor 4E type 2
GALK1	Galactokinase
PBXIP1	Pre-B-cell leukemia transcription factor-interacting protein 1
SRSF3	Serine/arginine-rich splicing factor 3
C2orf49	Ashwin
ATAD1	ATPase family AAA domain-containing protein 1
LZIC	Protein LZIC
FRMD8	FERM domain-containing protein 8
SSR3	Translocon-associated protein subunit gamma
RPRD2	Regulation of nuclear pre-mRNA domain-containing protein 2
LAMP2	Lysosome-associated membrane glycoprotein 2
STOM	Erythrocyte band 7 integral membrane protein
HADHB	Trifunctional enzyme subunit beta, mitochondrial;3-ketoacyl-CoA thiolase
METTL13	Methyltransferase-like protein 13
SPARCL1	SPARC-like protein 1
BCCIP	BRCA2 and CDKN1A-interacting protein
OS9	Protein OS-9
PCYT1A	Choline-phosphate cytidylyltransferase A
PRPSAP2	Phosphoribosyl pyrophosphate synthase-associated protein 2
USP28	Ubiquitin carboxyl-terminal hydrolase 28;Ubiquitin carboxyl-terminal hydrolase
RBPMS	RNA-binding protein with multiple splicing
SUPT7L	STAGA complex 65 subunit gamma
CDCA5	Sororin
EML4	Echinoderm microtubule-associated protein-like 4
GATAD2A	Transcriptional repressor p66-alpha
MPV17	Protein Mpv17
FRMD5	FERM domain-containing protein 5
ERLEC1	Endoplasmic reticulum lectin 1
CGREF1	Cell growth regulator with EF hand domain protein 1
PES1	Pescadillo homolog
R3HDM2	R3H domain-containing protein 2
PDIA6	Protein disulfide-isomerase A6
SIRT2	NAD-dependent protein deacetylase sirtuin-2
C2orf43	UPF0554 protein C2orf43
D2HGDH	D-2-hydroxyglutarate dehydrogenase, mitochondrial
ANKRD54	Ankyrin repeat domain-containing protein 54
RFT1	Protein RFT1 homolog
RAN	GTP-binding nuclear protein Ran
MAPK12	Mitogen-activated protein kinase 12
ERCC6L	DNA excision repair protein ERCC-6-like
RQCD1	Cell differentiation protein RCD1 homolog
EIF3CL;EIF3C	Eukaryotic translation initiation factor 3 subunit C
SEPT10	Septin-10
ATRIP	ATR-interacting protein
PPP1R12C	Protein phosphatase 1 regulatory subunit 12C
USP19	Ubiquitin carboxyl-terminal hydrolase;Ubiquitin carboxyl-terminal hydrolase 19
TCF7L2;TCF7L1;TCF7;LEF1	Transcription factor 7-like 2;Transcription factor 7-like 1;Lymphoid enhancer-binding factor 1;Transcription factor 7
CWC22	Pre-mRNA-splicing factor CWC22 homolog
EML3	Echinoderm microtubule-associated protein-like 3
USP24	Ubiquitin carboxyl-terminal hydrolase 24;Ubiquitin carboxyl-terminal hydrolase
HNRPLL	Heterogeneous nuclear ribonucleoprotein L-like
RIC8B	Synembryn-B
PPIP5K1	Inositol hexakisphosphate and diphosphoinositol-pentakisphosphate kinase 1
NTM	Neurotrimin
PDDC1	Parkinson disease 7 domain-containing protein 1
FBXO44	F-box only protein 44
GAS7	Growth arrest-specific protein 7
C5orf45	UPF0544 protein C5orf45
RNF14	E3 ubiquitin-protein ligase RNF14
KIF22	Kinesin-like protein KIF22
MTMR9	Myotubularin-related protein 9
PTPRA	Receptor-type tyrosine-protein phosphatase alpha
ACBD5	Acyl-CoA-binding domain-containing protein 5
ATP6V0A1	V-type proton ATPase 116 kDa subunit a isoform 1
SGCE	Epsilon-sarcoglycan
TXNRD1	Thioredoxin reductase 1, cytoplasmic
NT5C2	Cytosolic purine 5-nucleotidase
ARHGEF6	Rho guanine nucleotide exchange factor 6
PLXNB3	Plexin-B3
ALAD	Delta-aminolevulinic acid dehydratase
TMEM128	Transmembrane Protein 128
TBCE	Tubulin-specific chaperone E
LZTR1	Leucine-zipper-like transcriptional regulator 1
GLOD4	Glyoxalase domain-containing protein 4
ILK	Integrin-linked protein kinase
GGA3	ADP-ribosylation factor-binding protein GGA3
CAST	Calpastatin
KIFC3	Kinesin-like protein KIFC3
FGD4	FYVE, RhoGEF and PH domain-containing protein 4
HNRNPUL1	Heterogeneous nuclear ribonucleoprotein U-like protein 1
RPL31	60S ribosomal protein L31
DNASE2	Deoxyribonuclease-2-alpha
ST7	Suppression Of Tumorigenicity 7
WBP4	WW domain-binding protein 4
ERF	ETS domain-containing transcription factor ERF
MEIS2;MEIS1;MEIS3	Homeobox protein Meis2;Homeobox protein Meis1;Homeobox protein Meis3
INPP5K	Inositol polyphosphate 5-phosphatase K
TNFRSF10B	Tumor necrosis factor receptor superfamily member 10B
TPM1	Tropomyosin 1
SMAD2	Mothers against decapentaplegic homolog 2
AKT1	RAC-alpha serine/threonine-protein kinase
ANGEL2	Protein angel homolog 2
ACAD8	Isobutyryl-CoA dehydrogenase, mitochondrial
WARS2	Tryptophan--tRNA ligase, mitochondrial
RRAS2	Ras-related protein R-Ras2
FADS2	Fatty acid desaturase 2
SGCB	Beta-sarcoglycan
ABHD10	Abhydrolase domain-containing protein 10, mitochondrial
DECR1	2,4-dienoyl-CoA reductase, mitochondrial
CRIP2	Cysteine-rich protein 2
ZFYVE27	Protrudin
KIF2C	Kinesin-like protein KIF2C
TNFAIP8	Tumor necrosis factor alpha-induced protein 8
MTFMT	Methionyl-tRNA formyltransferase, mitochondrial
PDK1	[Pyruvate dehydrogenase [lipoamide]] kinase isozyme 1, mitochondrial
ETF1	Eukaryotic peptide chain release factor subunit 1
SESN3	Sestrin-3
PITPNB	Phosphatidylinositol transfer protein beta isoform
PASK	PAS domain-containing serine/threonine-protein kinase
ATL2	Atlastin-2
FNIP1;RAPGEF6	Rap guanine nucleotide exchange factor 6
USP7	Ubiquitin carboxyl-terminal hydrolase 7;Ubiquitin carboxyl-terminal hydrolase
DHCR24	Delta(24)-sterol reductase
RFX5	DNA-binding protein RFX5
SCAF8	Protein SCAF8
CCNY	Cyclin-Y
ARFGAP1	ADP-ribosylation factor GTPase-activating protein 1
RAB1A	Ras-related protein Rab-1A
NADKD1	NAD kinase domain-containing protein 1
EBF2	Transcription factor COE2
PFKFB3	6-phosphofructo-2-kinase/fructose-2,6-bisphosphatase 3;6-phosphofructo-2-kinase;Fructose-2,6-bisphosphatase
SH3PXD2A	SH3 and PX domain-containing protein 2A
BROX;C1orf58	BRO1 domain-containing protein BROX
ACADM	Medium-chain specific acyl-CoA dehydrogenase, mitochondrial
ATP6AP2	Renin receptor
CCT4	T-complex protein 1 subunit delta
DYNC1I2	Cytoplasmic dynein 1 intermediate chain 2
B3GAT3	Galactosylgalactosylxylosylprotein 3-beta-glucuronosyltransferase 3
EIF3K	Eukaryotic translation initiation factor 3 subunit K
PCYT2	Ethanolamine-phosphate cytidylyltransferase
RIPK4	Receptor-interacting serine/threonine-protein kinase 4
GALK2	N-acetylgalactosamine kinase
CAB39L	Calcium-binding protein 39-like
POGZ	Pogo transposable element with ZNF domain
SH3GLB2	Endophilin-B2
PPP2R5E	Serine/threonine-protein phosphatase 2A 56 kDa regulatory subunit epsilon isoform
SART3	Squamous cell carcinoma antigen recognized by T-cells 3
SEC24B	Protein transport protein Sec24B
SCARB1	Scavenger receptor class B member 1
USP48	Ubiquitin carboxyl-terminal hydrolase 48
FYCO1	FYVE and coiled-coil domain-containing protein 1
SEC31A	Protein transport protein Sec31A
PARP15	Poly [ADP-ribose] polymerase 15
KIAA1715;LNP	Protein lunapark
MTR	Methionine synthase
CLASP1	CLIP-associating protein 1
GMIP	GEM-interacting protein
EDEM3	ER degradation-enhancing alpha-mannosidase-like 3
WIZ	Protein Wiz
IMP4	U3 small nucleolar ribonucleoprotein protein IMP4
IL1R1	Interleukin-1 receptor type 1;Interleukin-1 receptor type 1, membrane form;Interleukin-1 receptor type 1, soluble form
MZT2B	Mitotic-spindle organizing protein 2B
SNRNP27	U4/U6.U5 small nuclear ribonucleoprotein 27 kDa protein
CNRIP1	CB1 cannabinoid receptor-interacting protein 1
METTL5	Methyltransferase-like protein 5
TAX1BP1	Tax1-binding protein 1
FAM176A	Protein FAM176A
LSM5	U6 snRNA-associated Sm-like protein LSm5
AFTPH	Aftiphilin
FAM126A	Hyccin
SUMO1	Small ubiquitin-related modifier 1
PTMA	Prothymosin alpha;Thymosin alpha-1
ANKZF1	Ankyrin repeat and zinc finger domain-containing protein 1
AVL9	Late secretory pathway protein AVL9 homolog
STEAP3	Metalloreductase STEAP3
USP39	U4/U6.U5 tri-snRNP-associated protein 2
LOXL3	Lysyl Oxidase Like 3
LGALSL	Galectin-related protein
GARNL1;RALGAPA1	Ral GTPase-activating protein subunit alpha-1
POLR1A	DNA-directed RNA polymerase I subunit RPA1;DNA-directed RNA polymerase
RBM12B	RNA-binding protein 12B
SETMAR	Histone-lysine N-methyltransferase SETMAR;Histone-lysine N-methyltransferase;Mariner transposase Hsmar1
DIAPH1	Protein diaphanous homolog 1
WASH2P;WASH3P;WASH6P;WASH1;WASH4P	WAS protein family homolog 2;Putative WAS protein family homolog 3;WAS protein family homolog 6;WAS protein family homolog 1;Putative WAS protein family homolog 4
SPG11	Spatacsin
MED30;MED30S	Mediator of RNA polymerase II transcription subunit 30
CADPS2	Calcium-dependent secretion activator 2
FASTK	Fas-activated serine/threonine kinase
NEU4	Neuraminidase 4
SSR1	Translocon-associated protein subunit alpha
FMNL2	Formin-like protein 2
DCUN1D1	DCN1-like protein 1
H2AFZ;H2AFV	Histone H2A.Z;Histone H2A.V;Histone H2A
CSTA	Cystatin-A
ACOX2	Peroxisomal acyl-coenzyme A oxidase 2;Acyl-coenzyme A oxidase
ZC3HC1	Nuclear-interacting partner of ALK
CCDC126	Coiled-coil domain-containing protein 126
PFN2	Profilin;Profilin-2
SRI	Sorcin
INTS12	Integrator complex subunit 12
NCOR2	Nuclear receptor corepressor 2
PMS2	Mismatch repair endonuclease PMS2
RNF181	E3 ubiquitin-protein ligase RNF181
PRRC2A	Protein PRRC2A
EEF1E1	Eukaryotic translation elongation factor 1 epsilon-1
SYNJ1	Synaptojanin-1
C2orf56	Protein midA homolog, mitochondrial
RNF123	E3 ubiquitin-protein ligase RNF123
TUBA8	Tubulin alpha-8 chain
DNAJB6	DnaJ homolog subfamily B member 6
PSMG4	Proteasome assembly chaperone 4
POLR2B	DNA-directed RNA polymerase II subunit RPB2;DNA-directed RNA polymerase
SETD1A	Histone-lysine N-methyltransferase SETD1A
C3orf26	Uncharacterized protein C3orf26
CROT	Peroxisomal carnitine O-octanoyltransferase
PPAN-P2RY11;PPAN	Suppressor of SWI4 1 homolog
REPIN1	Replication initiator 1
MOSPD3	Motile sperm domain-containing protein 3
RCC1	Regulator of chromosome condensation
IMMT	Inner Membrane Mitochondrial Protein
WDR45	WD repeat domain phosphoinositide-interacting protein 4
nlgn1;NLGN1	Neuroligin-1
C17orf49;BAP18	Chromatin complexes subunit BAP18
PDCD10	Programmed cell death protein 10
LIN9	Protein lin-9 homolog
AARSD1	Alanyl-tRNA editing protein Aarsd1
LRRC3B	Leucine-rich repeat-containing protein 3B
TEX264	Testis-expressed sequence 264 protein
C21orf59	Uncharacterized protein C21orf59
ZMAT3	Zinc finger matrin-type protein 3
TMEM50B	Transmembrane protein 50B
COX17	Cytochrome c oxidase copper chaperone
GTPBP8	GTP-binding protein 8
IGSF8	Immunoglobulin superfamily member 8
RBMS3	RNA-binding motif, single-stranded-interacting protein 3
RPSA;RPSAP58	40S ribosomal protein SA
NME6	Nucleoside diphosphate kinase 6;Nucleoside diphosphate kinase
NMD3	60S ribosomal export protein NMD3
BBX	HMG box transcription factor BBX
SRSF7	Serine/arginine-rich splicing factor 7
EPT1	Ethanolaminephosphotransferase 1
RBBP7	RB Binding Protein 7
MTX2	Metaxin-2
IFT57	Intraflagellar transport protein 57 homolog
SIDT2	SID1 transmembrane family member 2
SP100	Nuclear autoantigen Sp-100
AP4M1	AP-4 complex subunit mu-1
DRAP1	Dr1-associated corepressor
DIAPH3	Protein diaphanous homolog 3
AAMP	Angio-associated migratory cell protein
AZGP1	Zinc-alpha-2-glycoprotein
CPSF4	Cleavage and polyadenylation specificity factor subunit 4
DHX40	Probable ATP-dependent RNA helicase DHX40
MTMR2	Myotubularin-related protein 2
CDC42EP3	Cdc42 effector protein 3
APOD	Apolipoprotein D
GPS1	COP9 signalosome complex subunit 1
PTPRZ1	Receptor-type tyrosine-protein phosphatase zeta
CYCS	Cytochrome c
PELP1	Proline-, glutamic acid- and leucine-rich protein 1
ITM2C	Integral membrane protein 2C;CT-BRI3
MRPL39	39S ribosomal protein L39, mitochondrial
FAM82A1	Regulator of microtubule dynamics protein 2
TYMP	Thymidine phosphorylase
NRCAM	Neuronal cell adhesion molecule
KLHL22	Kelch-like protein 22
WHSC2	Negative elongation factor A
TBC1D1	TBC1 domain family member 1
SYNM	Synemin
APEH	Acylamino-acid-releasing enzyme
PPM1B	Protein phosphatase 1B
TRIM22	E3 ubiquitin-protein ligase TRIM22
MRPS34	28S ribosomal protein S34, mitochondrial
VPS8	Vacuolar protein sorting-associated protein 8 homolog
FAM207A	Protein FAM207A
ITGA6	Integrin alpha-6;Integrin alpha-6 heavy chain;Integrin alpha-6 light chain
SLC45A2	Membrane-associated transporter protein
POLR2H	DNA-directed RNA polymerases I, II, and III subunit RPABC3
FAM195B	Protein FAM195B
SCAF4	Splicing factor, arginine/serine-rich 15
FARP1	FERM, RhoGEF and pleckstrin domain-containing protein 1
IQSEC1	IQ motif and SEC7 domain-containing protein 1
PPIG	Peptidyl-prolyl cis-trans isomerase G;Peptidyl-prolyl cis-trans isomerase
NAA38	N-alpha-acetyltransferase 38, NatC auxiliary subunit
RPL24	60S ribosomal protein L24
MBNL1	Muscleblind-like protein 1
POT1	Protection of telomeres protein 1
CCNL1	Cyclin-L1
NKIRAS2	NF-kappa-B inhibitor-interacting Ras-like protein 2
SCAP	Sterol regulatory element-binding protein cleavage-activating protein
CCDC58	Coiled-coil domain-containing protein 58
GYG1	Glycogenin-1
OXSM	3-oxoacyl-[acyl-carrier-protein] synthase, mitochondrial
C7orf50	Uncharacterized protein C7orf50
STK11IP	Serine/threonine-protein kinase 11-interacting protein
DNAJB2	DnaJ homolog subfamily B member 2
LIMD1	LIM domain-containing protein 1
MDH1	Malate Dehydrogenase 1
LYRM4	LYR motif-containing protein 4
CHCHD3	Coiled-coil-helix-coiled-coil-helix domain-containing protein 3, mitochondrial
PDLIM2	PDZ and LIM domain protein 2
MFSD1	Major facilitator superfamily domain-containing protein 1
PITRM1	Presequence protease, mitochondrial
MTMR14	Myotubularin-related protein 14
CEP192	Centrosomal protein of 192 kDa
NDUFA11	NADH dehydrogenase [ubiquinone] 1 alpha subcomplex subunit 11
RTTN	Rotatin
NT5DC2	5-nucleotidase domain-containing protein 2
RFX7	DNA-binding protein RFX7
CCDC12	Coiled-coil domain-containing protein 12
L2HGDH	L-2-hydroxyglutarate dehydrogenase, mitochondrial
ARHGAP23	Rho GTPase-activating protein 23
C7orf59	UPF0539 protein C7orf59
POP7	Ribonuclease P protein subunit p20
SYPL1	Synaptophysin-like protein 1
RPL22L1	60S ribosomal protein L22-like 1
ST3GAL5	Lactosylceramide alpha-2,3-sialyltransferase
UBE2H	Ubiquitin-conjugating enzyme E2 H
CTNND1	Catenin delta-1
ARFGAP3	ADP-ribosylation factor GTPase-activating protein 3
RPL35A	60S ribosomal protein L35a
WBSCR22	Uncharacterized methyltransferase WBSCR22
RAPH1	Ras-associated and pleckstrin homology domains-containing protein 1
C1orf144	UPF0485 protein C1orf144
STX16-NPEPL1;STX16	Syntaxin-16
KRT31;KRT33A;KRT33B	Keratin, type I cuticular Ha1;Keratin, type I cuticular Ha3-I;Keratin, type I cuticular Ha3-II
KRT6A;KRT6C;KRT75	Keratin, type II cytoskeletal 6A;Keratin, type II cytoskeletal 6C;Keratin, type II cytoskeletal 75
KRT10	Keratin, type I cytoskeletal 10
KRT5;KRT79	Keratin, type II cytoskeletal 5;Keratin, type II cytoskeletal 79
KRT9	Keratin, type I cytoskeletal 9
KRT2	Keratin, type II cytoskeletal 2 epidermal
ACTB	Actin, cytoplasmic 1;Actin, cytoplasmic 1, N-terminally processed
ITIH3	Inter-alpha-trypsin inhibitor heavy chain H3
THBS1	Thrombospondin-1
KRT73;KRT74;KRT71;KRT72	Keratin, type II cytoskeletal 73;Keratin, type II cytoskeletal 74;Keratin, type II cytoskeletal 71;Keratin, type II cytoskeletal 72
HBD;HBB	Hemoglobin subunit delta;Hemoglobin subunit beta;LVV-hemorphin-7
TPM2	Tropomyosin beta chain
VTN	Vitronectin;Vitronectin V65 subunit;Vitronectin V10 subunit;Somatomedin-B
BTN3A3;BTN3A1;BTN3A2	Butyrophilin subfamily 3 member A3;Butyrophilin subfamily 3 member A1;Butyrophilin subfamily 3 member A2
EIF4G1	Eukaryotic translation initiation factor 4 gamma 1
TRIM2	Tripartite motif-containing protein 2
SDC3	Syndecan-3;Syndecan
AK4	Adenylate kinase isoenzyme 4, mitochondrial
IFIT1;IFIT1B	Interferon-induced protein with tetratricopeptide repeats 1;Interferon-induced protein with tetratricopeptide repeats 1B
SLC9A3R2	Na(+)/H(+) exchange regulatory cofactor NHE-RF2
XPO6	Exportin-6
SLC4A7	Sodium bicarbonate cotransporter 3
PPP3R1	Calcineurin subunit B type 1
RPL32	60S ribosomal protein L32
IRAK1	Interleukin-1 receptor-associated kinase 1
KRI1	Protein KRI1 homolog
TXNRD2	Thioredoxin reductase 2, mitochondrial
CAMK2D	Calcium/calmodulin-dependent protein kinase type II subunit delta
ELF2	E74 Like ETS Transcription Factor 2
RWDD4	RWD domain-containing protein 4
SLC41A3	Solute carrier family 41 member 3
HNRNPAB	Heterogeneous nuclear ribonucleoprotein A/B
NAAA	N-acylethanolamine-hydrolyzing acid amidase
C3orf37	UPF0361 protein C3orf37
POLR3G	DNA-directed RNA polymerase III subunit RPC7
ERCC6;PGBD3	DNA excision repair protein ERCC-6
MFSD10	Major facilitator superfamily domain-containing protein 10
TMA16	Translation machinery-associated protein 16
ANXA3	Annexin A3;Annexin
TMEM33	Transmembrane protein 33
CDK7	Cyclin-dependent kinase 7
SKP2	S-phase kinase-associated protein 2
UBE2D3;UBE2D2	Ubiquitin-conjugating enzyme E2 D3;Ubiquitin-conjugating enzyme E2 D2
RPL9	60S ribosomal protein L9
MRPL27	39S ribosomal protein L27, mitochondrial
RPS3A	40S ribosomal protein S3a
PDLIM5	PDZ and LIM domain protein 5
ARHGAP24	Rho GTPase-activating protein 24
RELL1	RELT-like protein 1
ARSK	Arylsulfatase K
EIF4E	Eukaryotic translation initiation factor 4E
MRPL3	39S ribosomal protein L3, mitochondrial
NHP2	H/ACA ribonucleoprotein complex subunit 2
GSTCD	Glutathione S-transferase C-terminal domain-containing protein
HSD17B11	Estradiol 17-beta-dehydrogenase 11
DCK	Deoxycytidine kinase
SNX14	Sorting nexin-14
RIOK2	Serine/threonine-protein kinase RIO2
PET112	Glutamyl-tRNA(Gln) amidotransferase subunit B, mitochondrial
SIL1	Nucleotide exchange factor SIL1
C16orf13	UPF0585 protein C16orf13
CSNK1A1;CSNK1A1L	Casein kinase I isoform alpha;Casein kinase I isoform alpha-like
HARS	Histidine--tRNA ligase, cytoplasmic
RNASET2	Ribonuclease T2
SEPT11	Septin-11
GRK4	G protein-coupled receptor kinase 4
MCC	Colorectal mutant cancer protein
STX18	Syntaxin-18
PIGG	GPI ethanolamine phosphate transferase 2
CYB5B	Cytochrome b5 type B
YIPF3	Protein YIPF3
SDHA	Succinate dehydrogenase [ubiquinone] flavoprotein subunit, mitochondrial
SGTB	Small glutamine-rich tetratricopeptide repeat-containing protein beta
CCNH	Cyclin-H
COL12A1	Collagen alpha-1(XII) chain
TAF9;TAF9B	Transcription initiation factor TFIID subunit 9;Transcription initiation factor TFIID subunit 9B
COX7A2	Cytochrome c oxidase subunit 7A2, mitochondrial
UFSP2	Ufm1-specific protease 2
CENPK	Centromere protein K
SERINC5	Serine incorporator 5
GRK6;GRK5	G protein-coupled receptor kinase 6;G protein-coupled receptor kinase 5
EXOSC9	Exosome complex component RRP45
SETD7	Histone-lysine N-methyltransferase SETD7
INPP4B	Type II inositol 3,4-bisphosphate 4-phosphatase
MAPK10;MAPK9;MAPK8	Mitogen-activated protein kinase 10;Mitogen-activated protein kinase 9;Mitogen-activated protein kinase 8
TPM1	Tropomyosin alpha-1 chain
RSRC2	Arginine/serine-rich coiled-coil protein 2
MMS22L	Protein MMS22-like
C15orf38	UPF0552 protein C15orf38
SMAP	Small acidic protein
HMMR	Hyaluronan mediated motility receptor
CLASP2	CLIP-associating protein 2
CCNC	Cyclin-C
SLC25A32	Mitochondrial folate transporter/carrier
NUDCD2	NudC domain-containing protein 2
TMEM55A	Transmembrane protein 55A
OSTM1	Osteopetrosis-associated transmembrane protein 1
TATDN1	Putative deoxyribonuclease TATDN1
INTS8	Integrator complex subunit 8
SLU7	Pre-mRNA-splicing factor SLU7
RWDD1	RWD domain-containing protein 1
LYPLA1	Acyl-protein thioesterase 1
PFDN1	Prefoldin subunit 1
MRPL15	39S ribosomal protein L15, mitochondrial
TCEB1	Transcription elongation factor B polypeptide 1
ERLIN2	Erlin-2
ENY2	Enhancer of yellow 2 transcription factor homolog
VDAC3	Voltage-dependent anion-selective channel protein 3
RPL30	60S ribosomal protein L30
TTI2	TELO2-interacting protein 2
MTERFD1	mTERF domain-containing protein 1, mitochondrial
ATOX1	Copper transport protein ATOX1
IMPA1	Inositol monophosphatase 1
RPL26;RPL26L1	60S ribosomal protein L26;60S ribosomal protein L26-like 1
TBCA	Tubulin-specific chaperone A
AP3M2	AP-3 complex subunit mu-2
TXNRD3	Thioredoxin reductase 3
AP3B1	AP-3 complex subunit beta-1
STAU2	Double-stranded RNA-binding protein Staufen homolog 2
RBM22	Pre-mRNA-splicing factor RBM22
COX7A2L	Cytochrome c oxidase subunit 7A-related protein, mitochondrial
FCHSD1	FCH and double SH3 domains protein 1
COPS6	COP9 signalosome complex subunit 6
SP110	Sp110 nuclear body protein
RIN1	Ras and Rab interactor 1
EPN2	Epsin-2
AKAP10	A-kinase anchor protein 10, mitochondrial
ASL	Argininosuccinate lyase
ASAH1	Acid ceramidase;Acid ceramidase subunit alpha;Acid ceramidase subunit beta
PPP1R2;PPP1R2P3	Protein phosphatase inhibitor 2;Putative protein phosphatase inhibitor 2-like protein 3
BRCA1	Breast cancer type 1 susceptibility protein
TNIP1	TNFAIP3-interacting protein 1
RAI14	Ankycorbin
TACC2	Transforming acidic coiled-coil-containing protein 2
MAP4K4	Mitogen-activated protein kinase kinase kinase kinase 4
MEN1	Menin
NCSTN	Nicastrin
RALBP1	RalA-binding protein 1
ISOC1	Isochorismatase domain-containing protein 1
MGA	MAX gene-associated protein
SYNE1	Nesprin-1
ADAR	Double-stranded RNA-specific adenosine deaminase
HLA-B	HLA class I histocompatibility antigen, B-44 alpha chain;HLA class I histocompatibility antigen, B-45 alpha chain
SEC24C	Protein transport protein Sec24C
ABI2	Abl interactor 2
NARF	Nuclear prelamin A recognition factor
RPL14	60S ribosomal protein L14
CD44	CD44 antigen
SEPT7	Septin-7
PDXDC1	Pyridoxal-dependent decarboxylase domain-containing protein 1
ACSL1	Long-chain-fatty-acid--CoA ligase 1
PRRC2C	Protein PRRC2C
CHEK1	Serine/threonine-protein kinase Chk1
IFI16	Gamma-interferon-inducible protein 16
NDUFV2	NADH dehydrogenase [ubiquinone] flavoprotein 2, mitochondrial
SNCA	Alpha-synuclein
ITPR1	Inositol 1,4,5-trisphosphate receptor type 1
GOSR2	Golgi SNAP receptor complex member 2
UBA5	Ubiquitin-like modifier-activating enzyme 5
NAA50	N-alpha-acetyltransferase 50
TANK	TRAF family member-associated NF-kappa-B activator
TSEN34	tRNA-splicing endonuclease subunit Sen34
IDH3G	Isocitrate dehydrogenase [NAD] subunit gamma, mitochondrial
DMD	Dystrophin
ACIN1	Apoptotic chromatin condensation inducer in the nucleus
HMGB3	High mobility group protein B3
VGLL4	Transcription cofactor vestigial-like protein 4
RPL15	60S ribosomal protein L15;Ribosomal protein L15
ERBB2IP	Protein LAP2
FAM136A	Protein FAM136A
ADPGK	ADP-dependent glucokinase
IK	Protein Red
MGAM	Maltase-glucoamylase, intestinal;Maltase;Glucoamylase;Putative maltase-glucoamylase-like protein FLJ16351
FAM48A	Protein FAM48A
PAPSS2	Bifunctional 3-phosphoadenosine 5-phosphosulfate synthase 2;Sulfate adenylyltransferase;Adenylyl-sulfate kinase
ATP2C1	Calcium-transporting ATPase type 2C member 1
CD22	B-cell receptor CD22
TARS	Threonyl-tRNA synthetase
ZC3H18	Zinc Finger CCCH-Type Containing 18
HSPA4L	Heat shock 70 kDa protein 4L
PTK2	Focal adhesion kinase 1
MAEA	Macrophage erythroblast attacher
SCLY	Selenocysteine lyase
SLC39A7	Zinc transporter SLC39A7
ANKRD26	Ankyrin repeat domain-containing protein 26
MRPL22	39S ribosomal protein L22, mitochondrial
ITGA2	Integrin Subunit Alpha 2
MTA1	Metastasis-associated protein MTA1
NDUFA10	NADH dehydrogenase [ubiquinone] 1 alpha subcomplex subunit 10, mitochondrial
ING3	Inhibitor of growth protein 3
DAGLB	Sn1-specific diacylglycerol lipase beta
TACC1	Transforming acidic coiled-coil-containing protein 1
PCM1	Pericentriolar material 1 protein
DNPEP	Aspartyl aminopeptidase
BPTF	Nucleosome-remodeling factor subunit BPTF
RPS24	40S ribosomal protein S24
POLE	DNA polymerase;DNA polymerase epsilon catalytic subunit A
PCCB	Propionyl-CoA carboxylase beta chain, mitochondrial
SMAP1	Stromal membrane-associated protein 1
PLOD2	Procollagen-lysine,2-oxoglutarate 5-dioxygenase 2
TCOF1	Treacle protein
MARK2	Serine/threonine-protein kinase MARK2
GPX8	Probable glutathione peroxidase 8;Glutathione peroxidase
BZW2	Basic leucine zipper and W2 domain-containing protein 2
GDI2	Rab GDP dissociation inhibitor beta
KANSL3	KAT8 regulatory NSL complex subunit 3
CSNK2A1	Casein kinase II subunit alpha
UGP2	UTP--glucose-1-phosphate uridylyltransferase
ABCD3	ATP-binding cassette sub-family D member 3
DUS2L	tRNA-dihydrouridine(20) synthase [NAD(P)+]-like
LIPA	Lipase;Lysosomal acid lipase/cholesteryl ester hydrolase
ANKRD17	Ankyrin repeat domain-containing protein 17
CAPN5	Calpain-5
MAP4	Microtubule-associated protein;Microtubule-associated protein 4
MDC1	Mediator of DNA damage checkpoint protein 1
PRPF3	U4/U6 small nuclear ribonucleoprotein Prp3
CYFIP2	Cytoplasmic FMR1-interacting protein 2
KLC1	Kinesin light chain 1
HDHD1	Pseudouridine-5-monophosphatase
PIGU	Phosphatidylinositol glycan anchor biosynthesis class U protein
SQLE	Squalene monooxygenase
PRPF31	U4/U6 small nuclear ribonucleoprotein Prp31
PCYOX1L	Prenylcysteine oxidase-like
MYO6	Unconventional myosin-VI
PPIL2	Peptidyl-prolyl cis-trans isomerase-like 2
EXOC6	Exocyst complex component 6
IQGAP2	Ras GTPase-activating-like protein IQGAP2
ASXL2	Putative Polycomb group protein ASXL2
TNFAIP2	Tumor necrosis factor alpha-induced protein 2
HYI	Putative hydroxypyruvate isomerase
NCOA2	Nuclear Receptor Coactivator 2
ZMIZ2	Zinc finger MIZ domain-containing protein 2
NDUFB5	NADH dehydrogenase [ubiquinone] 1 beta subcomplex subunit 5, mitochondrial
CSTF2	Cleavage stimulation factor subunit 2
UBE2L3	Ubiquitin-conjugating enzyme E2 L3
ACSS2	Acetyl-coenzyme A synthetase, cytoplasmic
C16orf62	UPF0505 protein C16orf62
NDUFB9	NADH dehydrogenase [ubiquinone] 1 beta subcomplex subunit 9
EIF4B	Eukaryotic translation initiation factor 4B
CALD1	Caldesmon
CHTF18	Chromosome transmission fidelity protein 18 homolog
GPX1	Glutathione peroxidase
RAVER1	Ribonucleoprotein PTB-binding 1
NACA	Nascent polypeptide-associated complex subunit alpha
TUBGCP5	Gamma-tubulin complex component 5
PDHX	Pyruvate dehydrogenase protein X component, mitochondrial
MGRN1	E3 ubiquitin-protein ligase MGRN1
ANO6	Anoctamin-6
MTX3	Metaxin-3
ALYREF	THO complex subunit 4
KIF2A	Kinesin-like protein KIF2A
WIPF1	WAS/WASL-interacting protein family member 1
SCN9A	Sodium channel protein type 9 subunit alpha
TRIM36	E3 ubiquitin-protein ligase TRIM36
MAPK3	Mitogen-activated protein kinase 3
TMEM199	Transmembrane protein 199
TMEM201	Transmembrane protein 201
PAICS	Multifunctional protein ADE2;Phosphoribosylaminoimidazole-succinocarboxamide synthase;Phosphoribosylaminoimidazole carboxylase
AGK	Acylglycerol kinase, mitochondrial
BUB1	Mitotic checkpoint serine/threonine-protein kinase BUB1
CELF2;CUGBP2	CUGBP Elav-like family member 2
EIF2B5	Translation initiation factor eIF-2B subunit epsilon
NLN	Neurolysin, mitochondrial
FDPS	Farnesyl pyrophosphate synthase
UBR7	Putative E3 ubiquitin-protein ligase UBR7
BCAR1	Breast cancer anti-estrogen resistance protein 1
USP15	Ubiquitin carboxyl-terminal hydrolase 15;Ubiquitin carboxyl-terminal hydrolase
ANAPC4	Anaphase-promoting complex subunit 4
OGDH	2-oxoglutarate dehydrogenase, mitochondrial
GUSB	Beta-glucuronidase
GOSR1	Golgi SNAP receptor complex member 1
SMC4	Structural maintenance of chromosomes protein 4;Structural maintenance of chromosomes protein
PXK	PX domain-containing protein kinase-like protein
FAM178B	Protein FAM178B
CKAP2	Cytoskeleton-associated protein 2
MYO1B	Unconventional myosin-Ib
CTH	Cystathionine gamma-lyase
KIF13A	Kinesin-like protein KIF13A
RAVER2	Ribonucleoprotein PTB-binding 2
MRPS17	28S ribosomal protein S17, mitochondrial
FN1	Fibronectin;Anastellin;Ugl-Y1;Ugl-Y2;Ugl-Y3
ACADS	Short-chain specific acyl-CoA dehydrogenase, mitochondrial
CDCA2	Cell division cycle-associated protein 2
UTP14A	U3 small nucleolar RNA-associated protein 14 homolog A
LRBA	Lipopolysaccharide-responsive and beige-like anchor protein
ING5	Inhibitor of growth protein 5
XPO7	Exportin-7
DNM2	Dynamin 2
DIP2A	Disco-interacting protein 2 homolog A
KIF3A	Kinesin-like protein KIF3A
APP	Amyloid beta A4 protein;N-APP;Soluble APP-alpha;Soluble APP-beta;C99;Beta-amyloid protein 42;Beta-amyloid protein 40;C83;P3(42);P3(40);C80;Gamma-secretase C-terminal fragment 59;Gamma-secretase C-terminal fragment 57;Gamma-secretase C-terminal fragment 50;C31
CUL9	Cullin-9
SUMF1	Sulfatase-modifying factor 1
TBL2	Transducin beta-like protein 2
VPS41	Vacuolar protein sorting-associated protein 41 homolog
URGCP	Up-regulator of cell proliferation
RND3	Rho-related GTP-binding protein RhoE
SSB	Lupus La protein
MITF;TFE3;TFEC	Microphthalmia-associated transcription factor;Transcription factor E3;Transcription factor EC
PPP2R5D	Serine/threonine-protein phosphatase 2A 56 kDa regulatory subunit delta isoform
MANBA	Beta-mannosidase
AP2M1	AP-2 complex subunit mu
CEP97	Centrosomal protein of 97 kDa
MCCC1	Methylcrotonoyl-CoA carboxylase subunit alpha, mitochondrial
PLIN2;ADFP	Perilipin-2
CHD3	Chromodomain-helicase-DNA-binding protein 3
MAP1A	Microtubule-associated protein 1A;MAP1 light chain LC2
MGEA5	Bifunctional protein NCOAT;Protein O-GlcNAcase;Histone acetyltransferase
RBM6	RNA-binding protein 6
GAK	Cyclin-G-associated kinase
TSN	Translin
RPS6KA1	Ribosomal protein S6 kinase alpha-1;Ribosomal protein S6 kinase
COPS8	COP9 signalosome complex subunit 8
TTC13	Tetratricopeptide repeat protein 13
LRRFIP1	Leucine-rich repeat flightless-interacting protein 1
GRID2	Glutamate receptor delta-2 subunit
PRDX3	Thioredoxin-dependent peroxide reductase, mitochondrial
FAM98A	Protein FAM98A
NCAPH	Condensin complex subunit 2
CYP20A1	Cytochrome P450 20A1
LARS2	Probable leucine--tRNA ligase, mitochondrial
GSTM2	Glutathione S-transferase Mu 2
PANK4	Pantothenate kinase 4
SSFA2	Sperm-specific antigen 2
RCE1	CAAX prenyl protease 2
DHDDS	Dehydrodolichyl diphosphate synthase
CEP164	Centrosomal protein of 164 kDa
MTG1	Mitochondrial GTPase 1
SPCS2	Signal peptidase complex subunit 2
BIRC2;BIRC3	Baculoviral IAP repeat-containing protein 2;Baculoviral IAP repeat-containing protein 3
HTATIP2	Oxidoreductase HTATIP2
GMDS	GDP-mannose 4,6 dehydratase
TMEM126A	Transmembrane protein 126A
NFYC	Nuclear transcription factor Y subunit gamma
MTCH2	Mitochondrial carrier homolog 2
DDX10	Probable ATP-dependent RNA helicase DDX10
NEU1	Sialidase-1
FAM118B	Protein FAM118B
SAMD1	Atherin
PHRF1	PHD and RING finger domain-containing protein 1
DHCR7	7-dehydrocholesterol reductase
C11orf73	Protein Hikeshi
SLC35F2	Solute carrier family 35 member F2
CYHR1	Cysteine and histidine-rich protein 1
RPL27A	60S ribosomal protein L27a
CLNS1A	Methylosome subunit pICln
CRYAB	Alpha-crystallin B chain
ACOT8	Acyl-coenzyme A thioesterase 8
RPS3	Ribosomal Protein S3
ECHDC1	Ethylmalonyl-CoA Decarboxylase 1
WLS	Protein wntless homolog
HSPA8	Heat Shock Protein Family A
SCYL1	N-terminal kinase-like protein
BCLAF1	Bcl-2-associated transcription factor 1
RXRB	Retinoic acid receptor RXR-beta
PPP6R3	Serine/threonine-protein phosphatase 6 regulatory subunit 3
PRMT1	Protein arginine N-methyltransferase 1
RELA	Transcription factor p65
UBTF	Nucleolar transcription factor 1
FADS3	Fatty acid desaturase 3
TRIM3	Tripartite motif-containing protein 3
CTSH	Pro-cathepsin H;Cathepsin H mini chain;Cathepsin H;Cathepsin H heavy chain;Cathepsin H light chain
ZCCHC11	Terminal uridylyltransferase 4
RPL8	60S ribosomal protein L8
BTF3L4	Transcription factor BTF3 homolog 4
HYOU1	Hypoxia up-regulated protein 1
PDE4DIP	Myomegalin
NEDD8	Magnesium-dependent phosphatase 1
CD151	CD151 antigen
RAB1B;RAB1C	Ras-related protein Rab-1B;Putative Ras-related protein Rab-1C
C11orf48	Chromosome 11 Open Reading Frame 48
EIF1AD	Probable RNA-binding protein EIF1AD
NPEPPS	Puromycin-sensitive aminopeptidase
VKORC1	Vitamin K epoxide reductase complex subunit 1
GPAA1	Glycosylphosphatidylinositol anchor attachment 1 protein
AASDHPPT	L-aminoadipate-semialdehyde dehydrogenase-phosphopantetheinyl transferase
TYK2	Non-receptor tyrosine-protein kinase TYK2;Tyrosine-protein kinase
USP47	Ubiquitin carboxyl-terminal hydrolase 47;Ubiquitin carboxyl-terminal hydrolase
PSMC3	26S protease regulatory subunit 6A
SIRT3	NAD-dependent protein deacetylase sirtuin-3, mitochondrial
APOL2	Apolipoprotein L2
SYVN1	E3 ubiquitin-protein ligase synoviolin
REPS1	RalBP1-associated Eps domain-containing protein 1
RHOC	Rho-related GTP-binding protein RhoC
LGALS8	Galectin-8
FAM54A	Protein FAM54A
RNASEH2C	Ribonuclease H2 subunit C
HSPA8	Heat Shock Protein Family A
CD59	CD59 glycoprotein
LRP8	Low-density lipoprotein receptor-related protein 8
LRRC14	Leucine-rich repeat-containing protein 14
CHID1	Chitinase domain-containing protein 1
C11orf54	Ester hydrolase C11orf54
RAE1	mRNA export factor
NDUFS8	NADH dehydrogenase [ubiquinone] iron-sulfur protein 8, mitochondrial
FAM125A	Multivesicular body subunit 12A
MLL	Histone-lysine N-methyltransferase MLL;MLL cleavage product N320;MLL cleavage product C180
PTPMT1	Protein-tyrosine phosphatase mitochondrial 1
SETDB1	Histone-lysine N-methyltransferase SETDB1
MICU1	Calcium uptake protein 1, mitochondrial
PFDN4	Prefoldin subunit 4
IFT46	Intraflagellar transport protein 46 homolog
FAU	40S ribosomal protein S30
SGK1	Serine/threonine-protein kinase Sgk1
NDUFC2;NDUFC2-KCTD14	NADH dehydrogenase [ubiquinone] 1 subunit C2
UBXN1	UBX domain-containing protein 1
FRG1	Protein FRG1
VPS26B	Vacuolar protein sorting-associated protein 26B
YAP1	Yorkie homolog
ARFIP2	Arfaptin-2
WDR74	WD repeat-containing protein 74
TM9SF1;CHMP4A	Charged multivesicular body protein 4a
FAM120B	Constitutive coactivator of peroxisome proliferator-activated receptor gamma
IQGAP3	Ras GTPase-activating-like protein IQGAP3
TRMT11	tRNA (guanine(10)-N2)-methyltransferase homolog
XPA	DNA repair protein complementing XP-A cells
FBRS	Probable fibrosin-1
TRRAP	Transformation/transcription domain-associated protein
CPNE1	Copine-1
FGGY	FGGY carbohydrate kinase domain-containing protein
TRMT2A	tRNA (uracil-5-)-methyltransferase homolog A
XPO4	Exportin-4
GALT	Galactose-1-phosphate uridylyltransferase
PDXK	Pyridoxal kinase
TMEM237	Transmembrane protein 237
RAP1GAP	Rap1 GTPase-activating protein 1
RPL35	60S ribosomal protein L35
TALDO1	Transaldolase
DNAJC19	Mitochondrial import inner membrane translocase subunit TIM14
PTGR1	Prostaglandin reductase 1
GOLT1B	Vesicle transport protein GOT1B
C11orf10	UPF0197 transmembrane protein C11orf10
CCDC53	WASH complex subunit CCDC53
PCDH7	Protocadherin-7
PPP2R5C	Serine/threonine-protein phosphatase 2A 56 kDa regulatory subunit gamma isoform
JUP;KRT16;KRT14;KRT15;KRT17;KRT19	Keratin, type I cytoskeletal 16;Keratin, type I cytoskeletal 14;Keratin, type I cytoskeletal 15;Keratin, type I cytoskeletal 17;Keratin, type I cytoskeletal 19
KIAA1609	TLD domain-containing protein KIAA1609
HSPA13	Heat shock 70 kDa protein 13
WNK1	Serine/threonine-protein kinase WNK1
SMAD5	Mothers against decapentaplegic homolog 5
LMAN2L	VIP36-like protein
CHD4	Chromodomain-helicase-DNA-binding protein 4
ELP2	Elongator complex protein 2
EPB41L3	Band 4.1-like protein 3
REXO2	Oligoribonuclease, mitochondrial
PSMD9	26S proteasome non-ATPase regulatory subunit 9
DNMT1	Cytosine-specific methyltransferase;DNA (cytosine-5)-methyltransferase 1
TRMT112	tRNA methyltransferase 112 homolog
FRYL	Protein furry homolog-like
SUCLA2	Succinyl-CoA ligase [ADP-forming] subunit beta, mitochondrial
UBAP1	Ubiquitin-associated protein 1
LTBR	Tumor necrosis factor receptor superfamily member 3
DNAJB11	DnaJ Heat Shock Protein Family
HDAC1	Histone deacetylase 1
DHX35	Probable ATP-dependent RNA helicase DHX35
ZCCHC8	Zinc finger CCHC domain-containing protein 8
PTMS	Parathymosin
RBM7	RNA-binding protein 7
DAD1	Dolichyl-diphosphooligosaccharide--protein glycosyltransferase subunit DAD1
GPNMB	Transmembrane glycoprotein NMB
MED24	Mediator of RNA polymerase II transcription subunit 24
UNG	Uracil-DNA glycosylase
CDK2AP1	Cyclin-dependent kinase 2-associated protein 1
SIPA1L1	Signal-induced proliferation-associated 1-like protein 1
SDHAF2	Succinate dehydrogenase assembly factor 2, mitochondrial
KPNA6	Importin subunit alpha;Importin subunit alpha-7
CMAS	N-acylneuraminate cytidylyltransferase
OTUB1	Ubiquitin thioesterase OTUB1
ATP6V0D1	V-type proton ATPase subunit d 1
ARSE	Arylsulfatase E
CAMKK2	Calcium/calmodulin-dependent protein kinase kinase 2
IFT27;RABL4	Intraflagellar transport protein 27 homolog
GLTP	Glycolipid transfer protein
TIAM1	T-lymphoma invasion and metastasis-inducing protein 1
SH3BP1	SH3 domain-binding protein 1
NPTN	Neuroplastin
PLEKHA2	Pleckstrin homology domain-containing family A member 2
MFGE8	Lactadherin;Lactadherin short form;Medin
LDHA	Lactate Dehydrogenase A
SLC3A2	4F2 cell-surface antigen heavy chain
POLR1B	DNA-directed RNA polymerase;DNA-directed RNA polymerase I subunit RPA2
TRIM21	E3 ubiquitin-protein ligase TRIM21
L1CAM	Neural cell adhesion molecule L1
GPHN	Gephyrin;Molybdopterin adenylyltransferase;Molybdopterin molybdenumtransferase
ORC4	Origin recognition complex subunit 4
TPD52	Tumor protein D52
ANAPC5	Anaphase-promoting complex subunit 5
SOX5	Transcription factor SOX-5
CADM1	Cell adhesion molecule 1
CLASRP	CLK4-associating serine/arginine rich protein
MLF2	Myeloid leukemia factor 2
NOL8	Nucleolar protein 8
RAB35	Ras-related protein Rab-35
MSRB3	Methionine-R-sulfoxide reductase B3
NRP2	Neuropilin-2
SPECC1L	Cytospin-A
CDH19	Cadherin-19
PCMTD1	Protein-L-isoaspartate O-methyltransferase domain-containing protein 1
PARVA	Alpha-parvin
PUS1	tRNA pseudouridine synthase A, mitochondrial;Pseudouridine synthase
TBC1D17	TBC1 domain family member 17
GOPC	Golgi-associated PDZ and coiled-coil motif-containing protein
CHPF	Chondroitin sulfate synthase 2
COPS7A	COP9 signalosome complex subunit 7a
DMXL1	DmX-like protein 1
PMEL	Melanocyte protein PMEL;M-alpha;M-beta
PIK3C2A	Phosphatidylinositol 4-phosphate 3-kinase C2 domain-containing subunit alpha
SVIL	Supervillin
DCTN2	Dynactin subunit 2
UBAP2	Ubiquitin-associated protein 2
XAB2	Pre-mRNA-splicing factor SYF1
HMBS	Porphobilinogen deaminase
RABEP1	Rab GTPase-binding effector protein 1
SEC23A	Protein transport protein Sec23A
ATP1A1	Sodium/potassium-transporting ATPase subunit alpha-1
PCDH1	Protocadherin-1
EIF3J	Eukaryotic translation initiation factor 3 subunit J
TSG101	Tumor susceptibility gene 101 protein
PRAME	Melanoma antigen preferentially expressed in tumors
RANBP3	Ran-binding protein 3
FN3KRP	Ketosamine-3-kinase
RAD9A	Cell cycle checkpoint control protein RAD9A
GOLPH3L	Golgi phosphoprotein 3-like
PXMP2	Peroxisomal membrane protein 2
MAP3K4	Mitogen-activated protein kinase kinase kinase 4
KLHDC5	Kelch domain-containing protein 5
BRK1	Protein BRICK1
NMT2	Glycylpeptide N-tetradecanoyltransferase;Glycylpeptide N-tetradecanoyltransferase 2
ACSF3	Acyl-CoA synthetase family member 3, mitochondrial
GRSF1	G-rich sequence factor 1
PNPLA6	Neuropathy target esterase
IFNGR1	Interferon gamma receptor 1
TNIK	TRAF2 and NCK-interacting protein kinase
CDC42BPA	Serine/threonine-protein kinase MRCK alpha
BCKDHA	2-oxoisovalerate dehydrogenase subunit alpha, mitochondrial
DDX55	ATP-dependent RNA helicase DDX55
HEATR5A	HEAT repeat-containing protein 5A
OXNAD1	Oxidoreductase NAD-binding domain-containing protein 1
DHX8	ATP-dependent RNA helicase DHX8
ASPH	Aspartyl/asparaginyl beta-hydroxylase
CPSF7	Cleavage and polyadenylation specificity factor subunit 7
MOGS	Mannosyl-oligosaccharide glucosidase
NOL10	Nucleolar protein 10
B2M	Beta-2-microglobulin;Beta-2-microglobulin form pI 5.3
NELL1	Protein kinase C-binding protein NELL1
ATL3	Atlastin-3
P2RX7	P2X purinoceptor 7;P2X purinoceptor
AIDA	Axin interactor, dorsalization-associated protein
WBP11	WW domain-binding protein 11
RTN3	Reticulon-3
SKIV2L2	Superkiller viralicidic activity 2-like 2
KIAA0494	EF-hand domain-containing protein KIAA0494
NCEH1	Neutral cholesterol ester hydrolase 1
RPS6KC1	Ribosomal protein S6 kinase delta-1
SCAPER	S phase cyclin A-associated protein in the endoplasmic reticulum
ZHX3	Zinc Fingers And Homeoboxes 3
NOMO2;NOMO3;NOMO1	Nodal modulator 2;Nodal modulator 3;Nodal modulator 1
INPP4A	Type I inositol 3,4-bisphosphate 4-phosphatase
MED21	Mediator of RNA polymerase II transcription subunit 21
ASCC1	Activating Signal Cointegrator 1 Complex Subunit 1
TRAP1	Heat shock protein 75 kDa, mitochondrial
TRPT1	tRNA 2-phosphotransferase 1
XRCC1	DNA repair protein XRCC1
ASH2L	Set1/Ash2 histone methyltransferase complex subunit ASH2
SEPHS2	Selenide, water dikinase 2
MVK	Mevalonate kinase
NAP1L4b;NAP1L4	Nucleosome assembly protein 1-like 4
HLA-DPA1	HLA class II histocompatibility antigen, DP alpha 1 chain
NUP153	Nuclear pore complex protein Nup153
DSTN	Destrin
TXNIP	Thioredoxin-interacting protein
C14orf43	Uncharacterized protein C14orf43
SDR39U1	Epimerase family protein SDR39U1
SIPA1	Signal-induced proliferation-associated protein 1
KDM1A	Lysine-specific histone demethylase 1A
TRAF4	TNF receptor-associated factor 4
NECAP2	Adaptin ear-binding coat-associated protein 2
PDE12	2,5-phosphodiesterase 12
SMARCA1	Probable global transcription activator SNF2L1
SRA1	Steroid receptor RNA activator 1
PBX2;PBX3;PBX1;PBX4	Pre-B-cell leukemia transcription factor 2;Pre-B-cell leukemia transcription factor 3;Pre-B-cell leukemia transcription factor 1;Pre-B-cell leukemia transcription factor 4
CNOT2	CCR4-NOT transcription complex subunit 2
HLA-E	HLA class I histocompatibility antigen, alpha chain E
CAD	CAD protein;Glutamine-dependent carbamoyl-phosphate synthase;Aspartate carbamoyltransferase;Dihydroorotase
KIF13B	Kinesin-like protein KIF13B
DDX39B;BAT1	Spliceosome RNA helicase DDX39B
CNOT4	CCR4-NOT transcription complex subunit 4
C12orf10	UPF0160 protein MYG1, mitochondrial
UIMC1	BRCA1-A complex subunit RAP80
HNRNPA1;HNRNPA1L2	Heterogeneous nuclear ribonucleoprotein A1;Heterogeneous nuclear ribonucleoprotein A1-like 2
GRASP	General receptor for phosphoinositides 1-associated scaffold protein
TSPAN31;TSPAN13	Tetraspanin-31;Tetraspanin-13
SCYL2	SCY1-like protein 2
E2F7	Transcription factor E2F7
NFYB	Nuclear transcription factor Y subunit beta
PLXNA1	Plexin-A1
YEATS4	YEATS domain-containing protein 4
PA2G4	Proliferation-associated protein 2G4
BAZ2A	Bromodomain adjacent to zinc finger domain protein 2A
FKBP11	Peptidyl-prolyl cis-trans isomerase FKBP11;Peptidyl-prolyl cis-trans isomerase
CHMP1A	Charged multivesicular body protein 1a
POC1B	Centriolar Protein B
COPZ1	Coatomer subunit zeta-1
DENR	Density-regulated protein
SLC25A3	Phosphate carrier protein, mitochondrial
TUBB	Tubulin beta chain
CSRP2	Cysteine and glycine-rich protein 2
RPL18	60S ribosomal protein L18
CD63	CD63 antigen
C12orf51	E3 ubiquitin transferase HECTD4, probable E3 ubiquitin-protein ligase
SLC6A15	Sodium-dependent neutral amino acid transporter B(0)AT2
SCAF11	Protein SCAF11
GIT2	ARF GTPase-activating protein GIT2
CHST11	Carbohydrate sulfotransferase 11
OAS1	2-5-oligoadenylate synthase 1
FGD6	FYVE, RhoGEF and PH domain-containing protein 6
TP53BP1	Tumor suppressor p53-binding protein 1
STRN4	Striatin-4
PPP1CC	Serine/threonine-protein phosphatase PP1-gamma catalytic subunit;Serine/threonine-protein phosphatase
CDK4	Cyclin-dependent kinase 4
CD63	CD63 Molecule
ACAD10	Acyl-CoA dehydrogenase family member 10
KRT18	Keratin, type I cytoskeletal 18
HLA-DRA	HLA class II histocompatibility antigen, DR alpha chain
RPL6	60S ribosomal protein L6
AK2	Adenylate kinase 2, mitochondrial
CHPT1	Cholinephosphotransferase 1
FMNL3	Formin-like protein 3
MYL6	Myosin light polypeptide 6
MON2	Protein MON2 homolog
NAP1L1	Nucleosome Assembly Protein 1 Like 1
NRBP1	Nuclear receptor-binding protein
BAP1	Ubiquitin carboxyl-terminal hydrolase BAP1
TSFM	Elongation factor Ts, mitochondrial;Elongation factor Ts
RASA3	Ras GTPase-activating protein 3
UBAP2L	Ubiquitin-associated protein 2-like
DCTN3	Dynactin subunit 3
CEP85	Centrosomal protein of 85 kDa
ABCD4	ATP-binding cassette sub-family D member 4
FAM162A	Protein FAM162A
FANCI	Fanconi anemia group I protein
ATP5J2;PTCD1	ATP synthase subunit f, mitochondrial
YTHDF1	YTH domain family protein 1
FAM120C	Constitutive coactivator of PPAR-gamma-like protein 2
GPATCH4	G patch domain-containing protein 4
TIA1	Nucleolysin TIA-1 isoform p40
MYOF	Myoferlin
PPP1R12B	Protein phosphatase 1 regulatory subunit 12B
ARMCX4	Armadillo Repeat Containing X-Linked 4
WDR44	WD repeat-containing protein 44
IGF2BP2	Insulin-like growth factor 2 mRNA-binding protein 2
CASK	Peripheral plasma membrane protein CASK
RFC5	Replication factor C subunit 5
DYRK1A;DYRK1B	Dual specificity tyrosine-phosphorylation-regulated kinase 1A;Dual specificity tyrosine-phosphorylation-regulated kinase 1B
CLCN6	Chloride transport protein 6
GAPVD1	GTPase-activating protein and VPS9 domain-containing protein 1
CCDC93	Coiled-coil domain-containing protein 93
STX3	Syntaxin-3
UCKL1	Uridine kinase;Uridine-cytidine kinase-like 1
ADAM22	Disintegrin and metalloproteinase domain-containing protein 22
DDX31	Probable ATP-dependent RNA helicase DDX31
STAG2	Cohesin subunit SA-2
FRMD4A	FERM domain-containing protein 4A
MRPL40	39S ribosomal protein L40, mitochondrial
ANKRD16	Ankyrin repeat domain-containing protein 16
RPP40	Ribonuclease P protein subunit p40
CD200	OX-2 membrane glycoprotein
VAMP2	Vesicle-associated membrane protein 2
UGT2B17;UGT2B15	UDP-glucuronosyltransferase 2B17;UDP-glucuronosyltransferase 2B15
ARPC4	Actin-related protein 2/3 complex subunit 4
SEC62	Translocation protein SEC62
TBX2	T-box transcription factor TBX2
RCN2	Reticulocalbin-2
CAPN7	Calpain-7
NUB1	NEDD8 ultimate buster 1
C3orf32	Protein Ssu-2 Homolog
RAD18	E3 ubiquitin-protein ligase RAD18
MYO5A	Unconventional myosin-Va
MMADHC	Methylmalonic aciduria and homocystinuria type D protein, mitochondrial
MKLN1	Muskelin
BCHE	Cholinesterase
DLGAP4	Disks large-associated protein 4
CPSF6	Cleavage and polyadenylation specificity factor subunit 6
TRAPPC2;TRAPPC2P1	Trafficking protein particle complex subunit 2;Trafficking protein particle complex subunit 2 protein TRAPPC2P1
ANKMY2	Ankyrin repeat and MYND domain-containing protein 2
NDUFV1	NADH dehydrogenase [ubiquinone] flavoprotein 1, mitochondrial
CTHRC1	Collagen triple helix repeat-containing protein 1
DERA	Putative deoxyribose-phosphate aldolase
CASP1	Caspase-1;Caspase-1 subunit p20;Caspase-1 subunit p10;Caspase
FTH1	Ferritin heavy chain;Ferritin
GSDMD	Gasdermin-D
LIN7C	Protein lin-7 homolog C
PON2	Serum paraoxonase/arylesterase 2
SRPX	Sushi repeat-containing protein SRPX
TJP1	Tight junction protein ZO-1
NKRF	NF-kappa-B-repressing factor
GAS2L3	GAS2-like protein 3
LOH12CR1	Loss of heterozygosity 12 chromosomal region 1 protein
ISYNA1	Inositol-3-phosphate synthase 1
ERCC3	TFIIH basal transcription factor complex helicase XPB subunit
GALNT2	Polypeptide N-acetylgalactosaminyltransferase 2;Polypeptide N-acetylgalactosaminyltransferase 2 soluble form
CBX5	Chromobox protein homolog 5
ERH	Enhancer of rudimentary homolog
ZFP36L1	Zinc finger protein 36, C3H1 type-like 1
ZFYVE26	Zinc finger FYVE domain-containing protein 26
TMEM189;UBE2V1;UBE2V2	Ubiquitin-conjugating enzyme E2 variant 1;Ubiquitin-conjugating enzyme E2 variant 2
DNAL1	Dynein light chain 1, axonemal
STAT2	Signal transducer and activator of transcription 2
GNG2	Guanine nucleotide-binding protein subunit gamma;Guanine nucleotide-binding protein G(I)/G(S)/G(O) subunit gamma-2
PRRX1	Paired mesoderm homeobox protein 1
MAX	Protein max
ATP6V1D	V-type proton ATPase subunit D
SLIRP	SRA stem-loop-interacting RNA-binding protein, mitochondrial
KIAA0586	Uncharacterized protein KIAA0586
PTCD1	Pentatricopeptide repeat-containing protein 1
XRCC3	DNA repair protein XRCC3
NDRG2	Protein NDRG2
PTGR2	Prostaglandin reductase 2
NUMB	Protein numb homolog
SLC25A29	Mitochondrial carnitine/acylcarnitine carrier protein CACL
DGKA	Diacylglycerol kinase alpha
C14orf133	Spermatogenesis-defective protein 39 homolog
GALC	Galactocerebrosidase
GMFB	Glia maturation factor beta
GSTZ1	Maleylacetoacetate isomerase
FRMD6	FERM domain-containing protein 6
DDX24	ATP-dependent RNA helicase DDX24
CTAGE5	Cutaneous T-cell lymphoma-associated antigen 5
ZFYVE1	Zinc finger FYVE domain-containing protein 1
CDK2	Cyclin-dependent kinase 2
NEMF	Nuclear export mediator factor NEMF
PRMT5	Protein arginine N-methyltransferase 5;Protein arginine N-methyltransferase 5, N-terminally processed
TEP1	Telomerase protein component 1
SMEK1	Serine/threonine-protein phosphatase 4 regulatory subunit 3A
PSMA6	Proteasome subunit alpha type;Proteasome subunit alpha type-6
TMEM48	Nucleoporin NDC1
B4GALT6	Beta-1,4-galactosyltransferase 6;Glucosylceramide beta-1,4-galactosyltransferase
ARID1B	AT-rich interactive domain-containing protein 1B
LARP4	La-related protein 4
TTC17	Tetratricopeptide repeat protein 17
UACA	Uveal autoantigen with coiled-coil domains and ankyrin repeats
PAPOLA	Poly(A) polymerase alpha
LAMB1	Laminin subunit beta-1
RNASEH2B	Ribonuclease H2 subunit B
RFTN1	Raftlin
PRRC1	Protein PRRC1
MAN2B1	Lysosomal alpha-mannosidase
SBF1	Myotubularin-related protein 5
DEPDC7	DEP domain-containing protein 7
C21orf2	Uncharacterized protein C21orf2
TMPO	Lamina-associated polypeptide 2, isoforms beta/gamma;Thymopoietin;Thymopentin
GPR107	Protein GPR107
USP11	Ubiquitin carboxyl-terminal hydrolase 11;Ubiquitin carboxyl-terminal hydrolase
TFPT	TCF3 fusion partner
NFKBIB	NF-kappa-B inhibitor beta
ELP4	Elongator complex protein 4
OTUD5	OTU domain-containing protein 5
MAPRE2	Microtubule-associated protein RP/EB family member 2
ARFGAP2	ADP-ribosylation factor GTPase-activating protein 2
ECT2	Protein ECT2
ILF3	Interleukin Enhancer Binding Factor 3
RETSAT	All-trans-retinol 13,14-reductase
NKIRAS1	NF-kappa-B inhibitor-interacting Ras-like protein 1
CSDE1	Cold shock domain-containing protein E1
PARP12	Poly [ADP-ribose] polymerase 12
TFG	Protein TFG
MRPS22	28S ribosomal protein S22, mitochondrial
CHPF2	Chondroitin sulfate glucuronyltransferase
ARAP3	Arf-GAP with Rho-GAP domain, ANK repeat and PH domain-containing protein 3
CLPTM1L	Cleft lip and palate transmembrane protein 1-like protein
PI4K2B	Phosphatidylinositol 4-kinase type 2-beta
C15orf40	UPF0235 protein C15orf40
TMOD2	Tropomodulin-2
DAAM2	Disheveled-associated activator of morphogenesis 2
SRGAP1	SLIT-ROBO Rho GTPase-activating protein 1
PDIA3	Protein disulfide-isomerase A3
COBLL1	Cordon-bleu protein-like 1
MAU2	MAU2 chromatid cohesion factor homolog
HNRNPH1	Heterogeneous nuclear ribonucleoprotein H;Heterogeneous nuclear ribonucleoprotein H, N-terminally processed
ERC1	ELKS/Rab6-interacting/CAST family member 1
DNM1L	Dynamin-1-like protein
LEPREL2	Prolyl 3-hydroxylase 3
PPP1R18	Phostensin
USE1	Vesicle transport protein USE1
TAF6	Transcription initiation factor TFIID subunit 6
KIAA0430	Meiosis arrest female protein 1
BLOC1S1	Biogenesis of lysosome-related organelles complex 1 subunit 1
CLCN7	H(+)/Cl(-) exchange transporter 7
MPRIP	Myosin Phosphatase Rho Interacting Protein
ATAD3A;ATAD3B	ATPase family AAA domain-containing protein 3A;ATPase family AAA domain-containing protein 3B
AMPD2	AMP deaminase 2
DPM1	Dolichol-phosphate mannosyltransferase
PRRC2B	Proline Rich Coiled-Coil 2B
FAM65A	Protein FAM65A
BRWD1	Bromodomain and WD repeat-containing protein 1
SIK3	Serine/threonine-protein kinase SIK3
MYD88	Myeloid Differentiation Primary Response 88
NAPEPLD	N-acyl-phosphatidylethanolamine-hydrolyzing phospholipase D
PPIF	Peptidyl-prolyl cis-trans isomerase F, mitochondrial;Peptidyl-prolyl cis-trans isomerase
DOCK4	Dedicator of cytokinesis protein 4
LACE1	Lactation elevated protein 1
TRIM33	E3 ubiquitin-protein ligase TRIM33
TRIM16	Tripartite motif-containing protein 16
RBMX;RBMXL1	RNA-binding motif protein, X chromosome
GOLGA4	Golgin subfamily A member 4
TTC5	Tetratricopeptide repeat protein 5
MTX1	Metaxin-1
TNRC6B	Trinucleotide repeat-containing gene 6B protein
CALM2;CALM1	Calmodulin
MLH1	DNA mismatch repair protein Mlh1
ACTR8	Actin-related protein 8
PIK3CB	Phosphatidylinositol 4,5-bisphosphate 3-kinase catalytic subunit beta isoform
MAP3K6	Mitogen-activated protein kinase kinase kinase 6
NVL	Nuclear valosin-containing protein-like
MTCH1	Mitochondrial carrier homolog 1
CENPC1	Centromere protein C 1
C6orf108	Deoxyribonucleoside 5-monophosphate N-glycosidase
ABCE1	ATP Binding Cassette Subfamily E Member 1
BMP2K	BMP-2-inducible protein kinase
LMF2	Lipase maturation factor 2
FAM134B	Protein FAM134B
DGKQ	Diacylglycerol kinase theta
PLXND1	Plexin-D1
ARHGEF10	Rho guanine nucleotide exchange factor 10
LOXL2	Lysyl oxidase homolog 2
MRPS28	28S ribosomal protein S28, mitochondrial
RRM2B	Ribonucleoside-diphosphate reductase subunit M2 B
CNOT7	CCR4-NOT transcription complex subunit 7
VPS37A	Vacuolar protein sorting-associated protein 37A
TRAPPC9	Trafficking protein particle complex subunit 9
ZFP91;ZNF692	E3 ubiquitin-protein ligase ZFP91;Zinc finger protein 692
ALG9	Alpha-1,2-mannosyltransferase ALG9
CRTC2	CREB-regulated transcription coactivator 2
SYTL2	Synaptotagmin-like protein 2
SSSCA1	Sjoegren syndrome/scleroderma autoantigen 1
C8orf82	UPF0598 protein C8orf82
GNE	Bifunctional UDP-N-acetylglucosamine 2-epimerase/N-acetylmannosamine kinase;UDP-N-acetylglucosamine 2-epimerase;N-acetylmannosamine kinase
RASSF8	Ras association domain-containing protein 8
FOXM1	Forkhead box protein M1
ESRRA	Steroid hormone receptor ERR1
DUS1L	tRNA-dihydrouridine(16/17) synthase [NAD(P)(+)]-like
ETNK1	Ethanolamine kinase 1
GATC	Glutamyl-tRNA(Gln) amidotransferase subunit C, mitochondrial
TDP1	Tyrosyl-DNA phosphodiesterase 1
MNAT1	CDK-activating kinase assembly factor MAT1
GMPR2	GMP reductase;GMP reductase 2
SEC11A	Signal peptidase complex catalytic subunit SEC11A
CERS2	Ceramide synthase 2
PAF	PCNA-associated factor
ANXA2	Annexin
IDH3A	Isocitrate dehydrogenase [NAD] subunit alpha, mitochondrial
MRPS11	28S ribosomal protein S11, mitochondrial
AP3S2	AP-3 complex subunit sigma-2
FAM63B	Protein FAM63B
FMN1	Formin-1
CASC4	Protein CASC4
NOP10	H/ACA ribonucleoprotein complex subunit 3
ZNF592	Zinc finger protein 592
DCAF11	DDB1- and CUL4-associated factor 11
T	Brachyury protein
LDLR	Low-density lipoprotein receptor
EIF2AK4	Eukaryotic translation initiation factor 2-alpha kinase 4
CTDSPL2	CTD small phosphatase-like protein 2
INO80	DNA helicase INO80
RPS27L	40S ribosomal protein S27;40S ribosomal protein S27-like
ANP32A	Acidic leucine-rich nuclear phosphoprotein 32 family member A
IREB2	Iron-responsive element-binding protein 2
WDR61	WD repeat-containing protein 61
RAB8B	Ras-related protein Rab-8B
ATPBD4	ATP-binding domain-containing protein 4
FAM158A	UPF0172 protein FAM158A
TYRO3	Tyrosine-protein kinase receptor TYRO3
ANXA2	Annexin
HDDC3	Guanosine-3,5-bis(diphosphate) 3-pyrophosphohydrolase MESH1
BLM	Bloom syndrome protein
GNB5	G Protein Subunit Beta 5
TPRN	Taperin
AKR7A2;AKR7L	Aflatoxin B1 aldehyde reductase member 2;Aflatoxin B1 aldehyde reductase member 4
DDX17	Probable ATP-dependent RNA helicase DDX17
SNAP23	Synaptosomal-associated protein 23;Synaptosomal-associated protein
AKTIP	AKT-interacting protein
CENPN	Centromere protein N
ARPP19	cAMP-regulated phosphoprotein 19
USP7	Ubiquitin Specific Peptidase 7
VPS33A	Vacuolar protein sorting-associated protein 33A
RNPS1	RNA-binding protein with serine-rich domain 1
DDX19B	ATP-dependent RNA helicase DDX19B
MAN2C1	Alpha-mannosidase 2C1
FAM192A	Protein FAM192A
RAB27A	Ras-related protein Rab-27A
ZFYVE19	Zinc finger FYVE domain-containing protein 19
POLR3E	DNA-directed RNA polymerase III subunit RPC5
KIAA0556
NDUFAB1	Acyl carrier protein, mitochondrial;Acyl carrier protein
ABAT	4-aminobutyrate aminotransferase, mitochondrial
ZFP106	Zinc finger protein 106 homolog
TRAPPC2L	Trafficking protein particle complex subunit 2-like protein
HEXA	Beta-hexosaminidase subunit alpha
ECI1	Enoyl-CoA delta isomerase 1, mitochondrial
MPI	Mannose-6-phosphate isomerase
MACF1	Microtubule-actin cross-linking factor 1, isoforms 1/2/3/5
FUS	RNA-binding protein FUS
AMHR2	Anti-Mullerian Hormone Receptor Type 2
NDUFB10	NADH dehydrogenase [ubiquinone] 1 beta subcomplex subunit 10
HAGH	Hydroxyacylglutathione hydrolase, mitochondrial
SIRPA;SIRPB1	Tyrosine-protein phosphatase non-receptor type substrate 1;Signal-regulatory protein beta-1 isoform 3
CCNDBP1	Cyclin-D1-binding protein 1
MAZ	Myc-associated zinc finger protein
COG8	Conserved oligomeric Golgi complex subunit 8
HNRNPUL2;hCG_2044799	Heterogeneous nuclear ribonucleoprotein U-like protein 2
TERF2	Telomeric repeat-binding factor 2
DCTN5	Dynactin subunit 5
WWP2	NEDD4-like E3 ubiquitin-protein ligase WWP2
GPR56	G-protein coupled receptor 56
UBFD1	Ubiquitin domain-containing protein UBFD1
MAP2K1	Dual specificity mitogen-activated protein kinase kinase 1
SULT1A1;SULT1A2	Sulfotransferase 1A1;Sulfotransferase 1A2
C16orf70	UPF0183 protein C16orf70
SENP8	Sentrin-specific protease 8
CIRH1A	Cirhin
COQ9	Ubiquinone biosynthesis protein COQ9, mitochondrial
GABARAPL2	Gamma-aminobutyric acid receptor-associated protein-like 2
MT2A	Metallothionein;Metallothionein-2
UBL7	Ubiquitin-like protein 7
FANCA	Fanconi anemia group A protein
PLDN	Pallidin
LRRC57	Leucine-rich repeat-containing protein 57
CTU2	Cytoplasmic tRNA 2-thiolation protein 2
MT1X	Metallothionein-1X;Metallothionein
PPP4C	Serine/threonine-protein phosphatase 4 catalytic subunit;Serine/threonine-protein phosphatase
DENND4A	C-myc promoter-binding protein
CDR2	Cerebellar degeneration-related protein 2
TMSB15B;TMSB15A	Thymosin beta-15A;Thymosin beta-15B
CES3	Carboxylesterase 3
ATXN2L	Ataxin-2-like protein
LONP2	Lon protease homolog 2, peroxisomal
STXBP5	Syntaxin-binding protein 5
RTKN	Rhotekin
GCA	Grancalcin
SMPD4	Sphingomyelin Phosphodiesterase 4
SAP130	Histone deacetylase complex subunit SAP130
ESYT2	Extended synaptotagmin-2
ABCB6	ATP-binding cassette sub-family B member 6, mitochondrial
SORBS2	Sorbin and SH3 domain-containing protein 2
SNX29	Sorting nexin-29
YIF1B	Protein YIF1B
COL18A1	Collagen alpha-1(XVIII) chain;Endostatin
PCMT1	Protein-L-isoaspartate O-methyltransferase;Protein-L-isoaspartate(D-aspartate) O-methyltransferase
GTF3C5	General transcription factor 3C polypeptide 5
NUPL1	Nucleoporin p58/p45
SMARCAL1	SWI/SNF-related matrix-associated actin-dependent regulator of chromatin subfamily A-like protein 1
KIF23	Kinesin-like protein KIF23
INTS9	Integrator complex subunit 9
CSNK1D	Casein kinase I isoform delta
PRKAR1B	cAMP-dependent protein kinase type I-beta regulatory subunit
MED23	Mediator of RNA polymerase II transcription subunit 23
ASB3	Ankyrin repeat and SOCS box protein 3
NBEAL1	Neurobeachin-like protein 1
TP53I3	Quinone oxidoreductase PIG3
PDIA3	Thioredoxin
ZNF259	ZPR1 Zinc Finger
C3orf75	Elongator complex protein 6 homolog
SAP18	Histone deacetylase complex subunit SAP18
KIAA1109	Uncharacterized protein KIAA1109
ZNF259	Zinc finger protein ZPR1
C2orf47	Uncharacterized protein C2orf47, mitochondrial
AP1S1	AP-1 complex subunit sigma-1A
RALGAPA2	Ral GTPase-activating protein subunit alpha-2
BET1	BET1 homolog
CC2D1B	Coiled-coil and C2 domain-containing protein 1B
APOO	Apolipoprotein O
CNOT10	CCR4-NOT transcription complex subunit 10
SLC6A8	Sodium- and chloride-dependent creatine transporter 1;Transporter
NOL7	Nucleolar protein 7
EBNA1BP2	Probable rRNA-processing protein EBP2
ST13;ST13P4;ST13P5	Hsc70-interacting protein;Putative protein FAM10A4;Putative protein FAM10A5
ATG2A	Autophagy-related protein 2 homolog A
PEX11B	Peroxisomal membrane protein 11B
SEC14L3;SEC14L2	SEC14 Like Lipid Binding 3
OSBPL10	Oxysterol-binding protein-related protein 10;Oxysterol-binding protein
SLBP	Histone RNA hairpin-binding protein
HLTF	Helicase-like transcription factor
RSRC1	Serine/Arginine-related protein 53
LRWD1	Leucine-rich repeat and WD repeat-containing protein 1
BTBD9	BTB/POZ domain-containing protein 9
GCOM1;POLR2M;GCOM2	DNA-directed RNA polymerase II subunit GRINL1A;Putative GRINL1B complex locus protein 2
EFR3A	Protein EFR3 homolog A
KIF18B	Kinesin-like protein KIF18B
SEPN1	Selenoprotein N
BRCC3	Lys-63-specific deubiquitinase BRCC36
GOLGA6L1;GOLGA6L6	Golgin subfamily A member 6-like protein 1;Putative golgin subfamily A member 6-like protein 6
	Uncharacterized protein FLJ45252
SMG1	Serine/threonine-protein kinase SMG1
DDX19A	ATP-dependent RNA helicase DDX19A
TXNDC17	Thioredoxin domain-containing protein 17
MED31	Mediator of RNA polymerase II transcription subunit 31
UBE2G1	Ubiquitin-conjugating enzyme E2 G1
GBA	Glucosylceramidase
CCDC137	Coiled-coil domain-containing protein 137
DVL2	Segment polarity protein dishevelled homolog DVL-2
DPH1	Diphthamide biosynthesis protein 1
NSMCE1	Non-structural maintenance of chromosomes element 1 homolog
DERP6	Dermal papilla-derived protein 6
ABHD12	Monoacylglycerol lipase ABHD12
FLYWCH2;FLYWCH1	FLYWCH family member 2;FLYWCH-type zinc finger-containing protein 1
TFAP4	Transcription factor AP-4
RAD17	Cell cycle checkpoint protein RAD17
RMI2	RecQ-mediated genome instability protein 2
CIC	Protein capicua homolog
AZI1	5-azacytidine-induced protein 1
LCMT1	Leucine carboxyl methyltransferase 1
NDE1	Nuclear distribution protein nudE homolog 1
PAFAH1B1	Platelet-activating factor acetylhydrolase IB subunit alpha
CHMP6	Charged multivesicular body protein 6
LSMD1	LSM domain-containing protein 1
HMOX2	Heme oxygenase 2
TOM1L1	TOM1-like protein 1
BSG	Basigin
BRD7	Bromodomain-containing protein 7
ABCC1	Multidrug resistance-associated protein 1
ANK2	Ankyrin-2
CENPI	Centromere protein I
UBR5	E3 ubiquitin-protein ligase UBR5
C19orf29	Uncharacterized protein C19orf29
SMARCD2;SMARCD3	SWI/SNF-related matrix-associated actin-dependent regulator of chromatin subfamily D member 2;SWI/SNF-related matrix-associated actin-dependent regulator of chromatin subfamily D member 3
LAMTOR3	Ragulator complex protein LAMTOR3
EIF2B1	Translation initiation factor eIF-2B subunit alpha
INTS2	Integrator complex subunit 2
PI4KA	Phosphatidylinositol 4-kinase alpha
NUSAP1	Nucleolar and spindle-associated protein 1
RCOR1;RCOR3	REST corepressor 1;REST corepressor 3
TBC1D8B	TBC1 domain family member 8B
GOLGA7	Golgin subfamily A member 7
GTF2A1	Transcription initiation factor IIA subunit 1;Transcription initiation factor IIA alpha chain;Transcription initiation factor IIA beta chain
SAAL1	Serum Amyloid A Like 1
ETFDH	Electron transfer flavoprotein-ubiquinone oxidoreductase, mitochondrial
CCS	Copper chaperone for superoxide dismutase
SENP3	Sentrin-specific protease 3
COG4	Conserved oligomeric Golgi complex subunit 4
TBC1D15	TBC1 domain family member 15
AP4S1	AP-4 complex subunit sigma-1
MTSS1	Metastasis suppressor protein 1
SEC16A	Protein transport protein Sec16A
DDX41	Probable ATP-dependent RNA helicase DDX41
RAB11FIP1	Rab11 family-interacting protein 1
MARK3;MARK1;MARK2	MAP/microtubule affinity-regulating kinase 3;Serine/threonine-protein kinase MARK1
ALDH6A1	Methylmalonate-semialdehyde dehydrogenase [acylating], mitochondrial
FHL2	Four and a half LIM domains protein 2
MYO18A	Unconventional myosin-XVIIIa
VPS13D	Vacuolar protein sorting-associated protein 13D
HDAC7	Histone deacetylase 7
APBB1	Amyloid beta A4 precursor protein-binding family B member 1
NDUFS2	NADH dehydrogenase [ubiquinone] iron-sulfur protein 2, mitochondrial
LUC7L3	Luc7-like protein 3
DNAJB12	DnaJ homolog subfamily B member 12
FAM83H	Protein FAM83H
ALDOA	Fructose-bisphosphate aldolase A;Fructose-bisphosphate aldolase
SMCR7	Mitochondrial dynamic protein MID49
TRABD	TraB domain-containing protein
PDP1	[Pyruvate dehydrogenase [acetyl-transferring]]-phosphatase 1, mitochondrial
MCM4	DNA replication licensing factor MCM4
MPST	3-mercaptopyruvate sulfurtransferase;Sulfurtransferase
PHB2	Prohibitin-2
MYCBP2	Probable E3 ubiquitin-protein ligase MYCBP2
HADH	Hydroxyacyl-coenzyme A dehydrogenase, mitochondrial
OLA1	Obg-like ATPase 1
PTRH2	Peptidyl-tRNA hydrolase 2, mitochondrial
FKBP8	Peptidyl-prolyl cis-trans isomerase FKBP8
PPP1R37	Protein phosphatase 1 regulatory subunit 37
THUMPD1	THUMP domain-containing protein 1
SUN2	SUN domain-containing protein 2
GSPT1	Eukaryotic peptide chain release factor GTP-binding subunit ERF3A
C11orf68	UPF0696 protein C11orf68
SUMF2	Sulfatase-modifying factor 2
CPS1	Carbamoyl-phosphate synthase [ammonia], mitochondrial
CDC7	Cell division cycle 7-related protein kinase
BABAM1	BRISC and BRCA1-A complex member 1
KCTD1	BTB/POZ domain-containing protein KCTD1
CDKN1A	Cyclin-dependent kinase inhibitor 1
C7orf25	UPF0415 protein C7orf25
IVD	Isovaleryl-CoA dehydrogenase, mitochondrial
QTRTD1	Queuine tRNA-ribosyltransferase subunit QTRTD1
TBCD	Tubulin-specific chaperone D
NT5C	5(3)-deoxyribonucleotidase, cytosolic type
AURKB	Aurora kinase B
MAP3K3	Mitogen-activated protein kinase kinase kinase 3
SS18	Protein SSXT
TANC2	Protein TANC2
LIMD2	LIM domain-containing protein 2
DHRS7B	Dehydrogenase/reductase SDR family member 7B
RPL17	60S ribosomal protein L17
ICT1	Peptidyl-tRNA hydrolase ICT1, mitochondrial
DCXR	L-xylulose reductase
C17orf62	Uncharacterized protein C17orf62
SPECC1	Cytospin-B
FUK	L-fucose kinase
GLTPD1	Glycolipid transfer protein domain-containing protein 1
RPL38	60S ribosomal protein L38
FBXL20	F-box/LRR-repeat protein 20
DDX5	Probable ATP-dependent RNA helicase DDX5
RPL19	60S ribosomal protein L19
ARHGDIA	Rho GDP-dissociation inhibitor 1
MIEN1	Migration and invasion enhancer 1
SRSF1	Serine/arginine-rich splicing factor 1
CDK11B;CDK11A;CDC2L2	Cyclin-dependent kinase 11B;Cyclin-dependent kinase 11A
RECQL5	ATP-dependent DNA helicase Q5
CHERP	Calcium homeostasis endoplasmic reticulum protein
NSFL1C	NSFL1 cofactor p47
RAD51C	DNA repair protein RAD51 homolog 3
PSMB10	Proteasome subunit beta type-10
SCO1	Protein SCO1 homolog, mitochondrial
SCRN2	Secernin-2
STARD3	StAR-related lipid transfer protein 3
MRPS23	28S ribosomal protein S23, mitochondrial
MRPS7	28S ribosomal protein S7, mitochondrial
SAP30BP	SAP30-binding protein
TRAPPC8	Trafficking protein particle complex subunit 8
SUZ12	Polycomb protein SUZ12
IFT20	Intraflagellar transport protein 20 homolog
ALDH3A2	Fatty aldehyde dehydrogenase
TIMM21	Mitochondrial import inner membrane translocase subunit Tim21
ORMDL3	ORM1-like protein 3
MYO1D	Unconventional myosin-Id
MYL12B;MYL12A;MYL9	Myosin regulatory light chain 12B;Myosin regulatory light chain 12A;Myosin regulatory light polypeptide 9
YES1;FYN	Tyrosine-protein kinase Yes
GIT1	ARF GTPase-activating protein GIT1
HELZ	Probable helicase with zinc finger domain
CDK12	Cyclin-dependent kinase 12
VEZF1	Vascular endothelial zinc finger 1
FNBP1L	Formin-binding protein 1-like
RSL1D1	Ribosomal L1 domain-containing protein 1
SAMD4A	Protein Smaug homolog 1
PPME1	Protein phosphatase methylesterase 1
BUB3	Mitotic checkpoint protein BUB3
CRBN	Protein cereblon
BAG1	BAG family molecular chaperone regulator 1
C17orf75	Protein Njmu-R1
LMNB2	Lamin-B2
RHOT1	Mitochondrial Rho GTPase 1;Mitochondrial Rho GTPase
CUL4B	Cullin-4B
EML2	Echinoderm microtubule-associated protein-like 2
WDR18	WD repeat-containing protein 18
QIL1	Protein QIL1
SMAD4	Mothers against decapentaplegic homolog 4
FAM32A	Protein FAM32A
NAGPA	N-acetylglucosamine-1-phosphodiester alpha-N-acetylglucosaminidase
FAM134C	Protein FAM134C
SYNGR2	Synaptogyrin-2
CTDP1	RNA polymerase II subunit A C-terminal domain phosphatase
LONP1	Lon protease homolog, mitochondrial;Lon protease homolog
PGS1	CDP-diacylglycerol--glycerol-3-phosphate 3-phosphatidyltransferase, mitochondrial
PSMD8	26S proteasome non-ATPase regulatory subunit 8
FAM210A	Protein FAM210A
H3F3A;HIST3H3	Histone H3.3;Histone H3.1t;Histone H3
PSMC3IP	Homologous-pairing protein 2 homolog
STAT5A	Signal transducer and activator of transcription 5A
C19orf25	UPF0449 protein C19orf25
HAUS1	HAUS augmin-like complex subunit 1
FAM100A	Protein FAM100A
POLR2I	DNA-directed RNA polymerase II subunit RPB9
POLRMT	DNA-directed RNA polymerase, mitochondrial
PLEKHF1	Pleckstrin homology domain-containing family F member 1
RPS15	40S ribosomal protein S15
RPL27	60S ribosomal protein L27
LSM12	Protein LSM12 homolog
PRKCSH	Glucosidase 2 subunit beta
ATF7	Cyclic AMP-dependent transcription factor ATF-7
TMEM205	Transmembrane protein 205
SEH1L	Nucleoporin SEH1
ASF1B	Histone chaperone ASF1B
FECH	Ferrochelatase, mitochondrial
EIF1	Eukaryotic translation initiation factor 1
PIGN	GPI ethanolamine phosphate transferase 1
UBE2S	Ubiquitin-conjugating enzyme E2 S
HMHA1	Minor histocompatibility protein HA-1;Minor histocompatibility antigen HA-1
CYGB	Cytoglobin
C19orf66	UPF0515 protein C19orf66
ECSIT	Evolutionarily conserved signaling intermediate in Toll pathway, mitochondrial
GLYR1	Putative oxidoreductase GLYR1
NFIC	Nuclear factor 1 C-type
ELOF1	Transcription elongation factor 1 homolog
PIN1	Peptidyl-prolyl cis-trans isomerase NIMA-interacting 1
NUDT16L1	Protein syndesmos
C19orf52	Uncharacterized protein C19orf52
STAT3	Signal transducer and activator of transcription 3
C18orf8	Uncharacterized protein C18orf8
RBM42	RNA-binding protein 42
ROGDI	Protein rogdi homolog
TAF15	TATA-binding protein-associated factor 2N
DAZAP1	DAZ-associated protein 1
UBL5	Ubiquitin-like protein 5
PLIN3	Perilipin-3
USP32	Ubiquitin carboxyl-terminal hydrolase 32
ZNF532	Zinc finger protein 532
KDSR	3-ketodihydrosphingosine reductase
POP4	Ribonuclease P protein subunit p29
APOC1	Apolipoprotein C-I;Truncated apolipoprotein C-I
TK1	Thymidine kinase, cytosolic
PIAS2	E3 SUMO-protein ligase PIAS2
BLMH	Bleomycin hydrolase
TXNL4A	Thioredoxin-like protein 4A
MRPL4	39S ribosomal protein L4, mitochondrial
BCAS3	Breast carcinoma-amplified sequence 3
DNM2	Dynamin-2
DCAKD	Dephospho-CoA kinase domain-containing protein
TTC28	Tetratricopeptide repeat protein 28
SARS2;FBXO17	Serine--tRNA ligase, mitochondrial
ZNF773;ZNF154	Zinc finger protein 773;Zinc finger protein 154
PAF1	RNA polymerase II-associated factor 1 homolog
MCOLN1	Mucolipin-1
C19orf10	UPF0556 protein C19orf10
BCAT2	Branched-chain-amino-acid aminotransferase, mitochondrial;Branched-chain-amino-acid aminotransferase
TXN2	Thioredoxin, mitochondrial
SNRPA	U1 small nuclear ribonucleoprotein A
FBL	rRNA 2-O-methyltransferase fibrillarin
HNRNPL	Heterogeneous nuclear ribonucleoprotein L
ZNF428	Zinc finger protein 428
SYDE1	Rho GTPase-activating protein SYDE1
PTOV1	Prostate tumor-overexpressed gene 1 protein
PIH1D1	PIH1 domain-containing protein 1
VRK3	Inactive serine/threonine-protein kinase VRK3
SHKBP1	SH3KBP1-binding protein 1
FBXO17	F-box only protein 17
EVI5L	EVI5-like protein
SAMD4B	Protein Smaug homolog 2
LRRC8E	Leucine-rich repeat-containing protein 8E
IRF3	Interferon regulatory factor 3
ALKBH7	Probable alpha-ketoglutarate-dependent dioxygenase ABH7
HOMER3	Homer protein homolog 3
ARHGEF1	Rho guanine nucleotide exchange factor 1
ARHGEF18	Rho guanine nucleotide exchange factor 18
PRKD2	Serine/threonine-protein kinase D2
EXOSC5	Exosome complex component RRP46
RPS5	40S ribosomal protein S5;40S ribosomal protein S5, N-terminally processed
PLEKHA4	Pleckstrin homology domain-containing family A member 4
STAP2	Signal-transducing adaptor protein 2
MYO9B	Unconventional myosin-IXb
AXL	Tyrosine-protein kinase receptor UFO
EPS15L1	Epidermal growth factor receptor substrate 15-like 1
MRPL51	39S ribosomal protein L51, mitochondrial
GPR108	Protein GPR108
POLD1	DNA polymerase delta catalytic subunit
TRIP10	Cdc42-interacting protein 4
CCDC94	Coiled-coil domain-containing protein 94
SUGP2	SURP and G-patch domain-containing protein 2
NOSIP	Nitric oxide synthase-interacting protein
PNKP	Bifunctional polynucleotide phosphatase/kinase;Polynucleotide 3-phosphatase;Polynucleotide 5-hydroxyl-kinase
AGPS	Alkyldihydroxyacetonephosphate synthase, peroxisomal
DDX39A;DDX39	ATP-dependent RNA helicase DDX39A
PDLIM1	PDZ and LIM domain protein 1
ACOT7	Cytosolic acyl coenzyme A thioester hydrolase
MYO1C	Unconventional myosin-Ic
HAX1	HCLS1-associated protein X-1
AIP	AH receptor-interacting protein;Peptidyl-prolyl cis-trans isomerase
GTPBP1	GTP-binding protein 1
STXBP3	Syntaxin-binding protein 3
NFKBIE	NF-kappa-B inhibitor epsilon
PSMD11	26S proteasome non-ATPase regulatory subunit 11
PSMD12	26S proteasome non-ATPase regulatory subunit 12
PGRMC1	Membrane-associated progesterone receptor component 1
SUPT5H	Transcription elongation factor SPT5
TAF4	Transcription initiation factor TFIID subunit 4
DFFA	DNA fragmentation factor subunit alpha
HIP1	Huntingtin-interacting protein 1
CLIC1	Chloride intracellular channel protein 1
[truncated: 3,709 more rows]
